# Supplementary material for: Synthesis of thioesters through copper-catalyzed coupling of aldehydes with thiols in water
Source: Royal Society of Chemistry journal article supplement (doi:10.1039/c3gc40946e), 2013-01-01

## Supplementary Information

### Synthesis of thioesters through copper-catalyzed coupling of aldehydes with thiols in water

Chih-Lun Yi, Yu-Ting Huang, and Chin-Fa Lee\*

Department of Chemistry, National Chung Hsing University, Taichung, Taiwan 402, R.O.C

E-mail: [cfalee@dragon.nchu.edu.tw](mailto:cfalee@dragon.nchu.edu.tw)

#### Table of Contents

|                                                 |   |
|-------------------------------------------------|---|
| 1. General information for NMR measurement..... | 2 |
| 2. NMR Spectra of Compounds.....                | 3 |

## 1. General information for NMR measurement

Proton and carbon nuclear magnetic resonance spectra ( $^1\text{H}$  and  $^{13}\text{C}$  NMR) were recorded in  $\text{CDCl}_3$ . Chemical shifts ( $\delta$ ) are reported in ppm, and coupling constants ( $J$ ) are given in Hz.



Ethyl 2-(benzoylthio)acetate (**3b**)

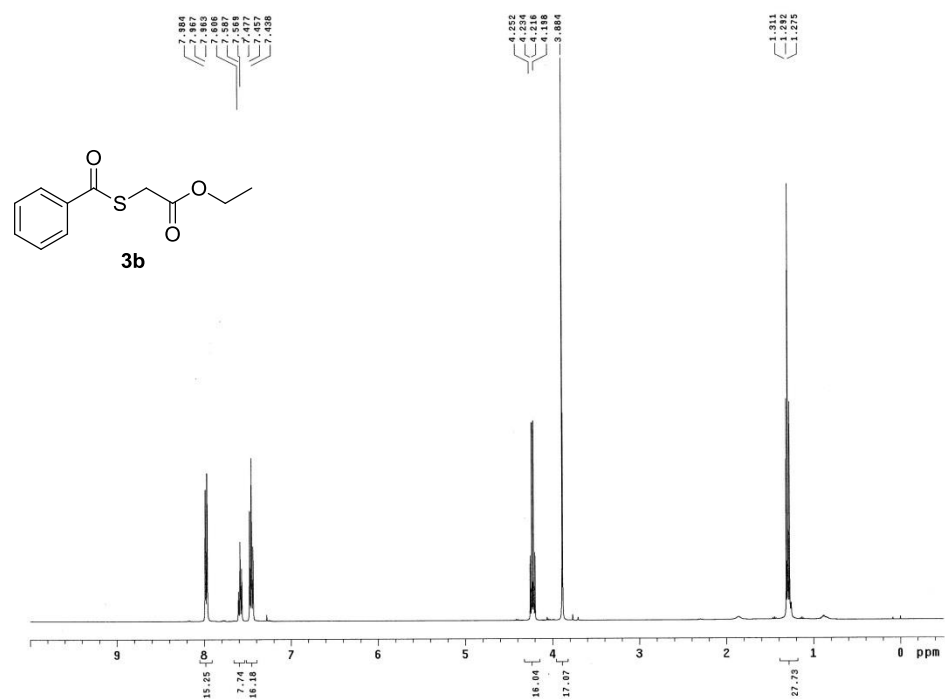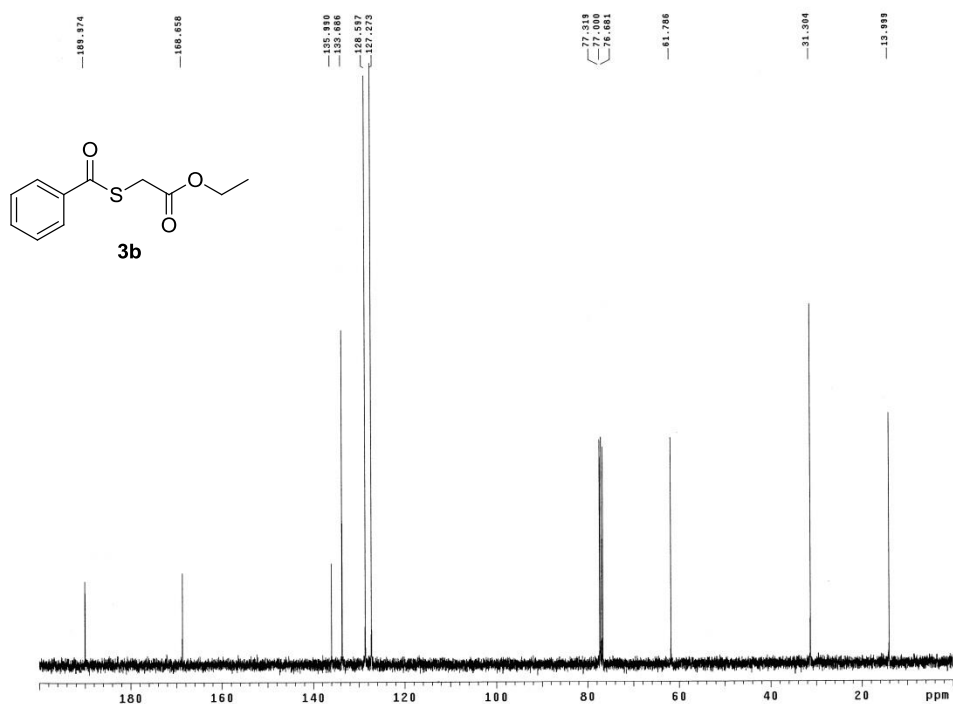

**S-Dodecyl 4-chlorobezothioate (3c)**

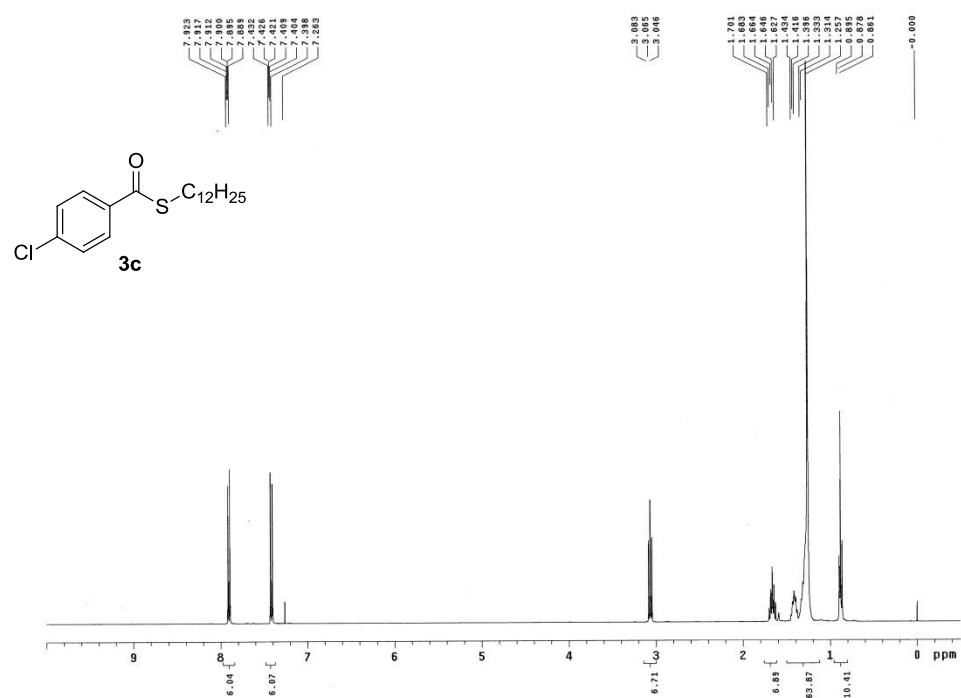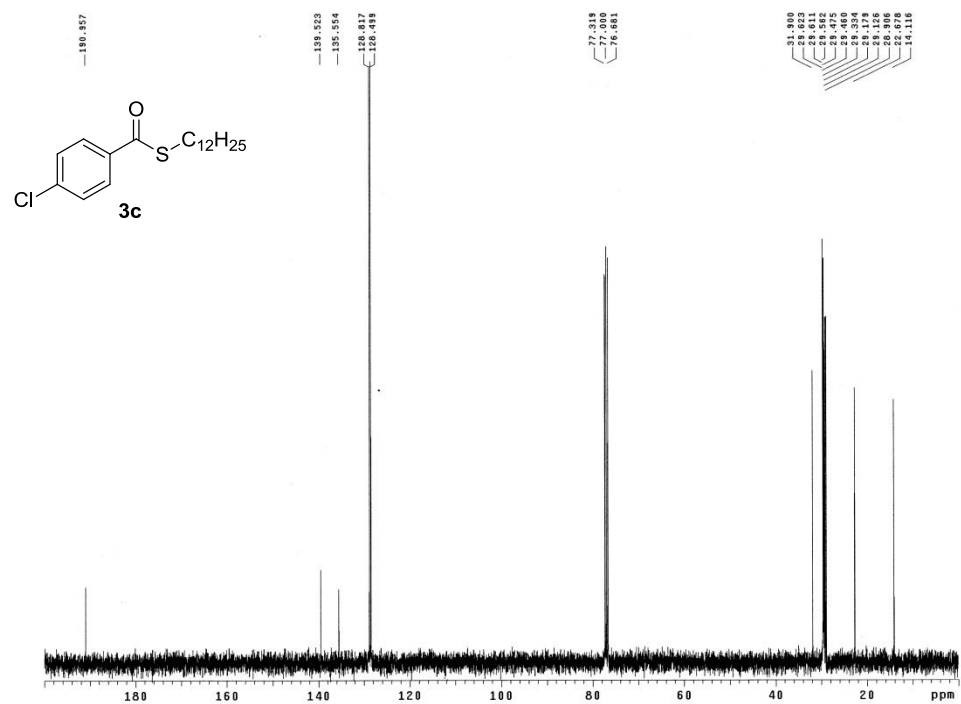



Ethyl 2-((4-chlorobenzoyl)thio)acetate (3e)

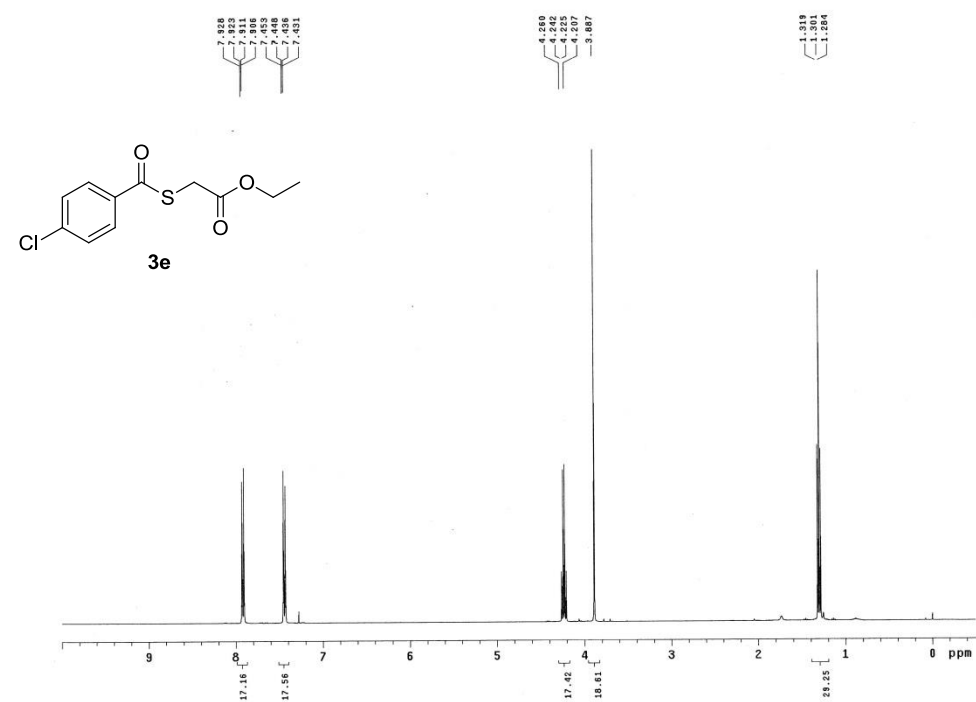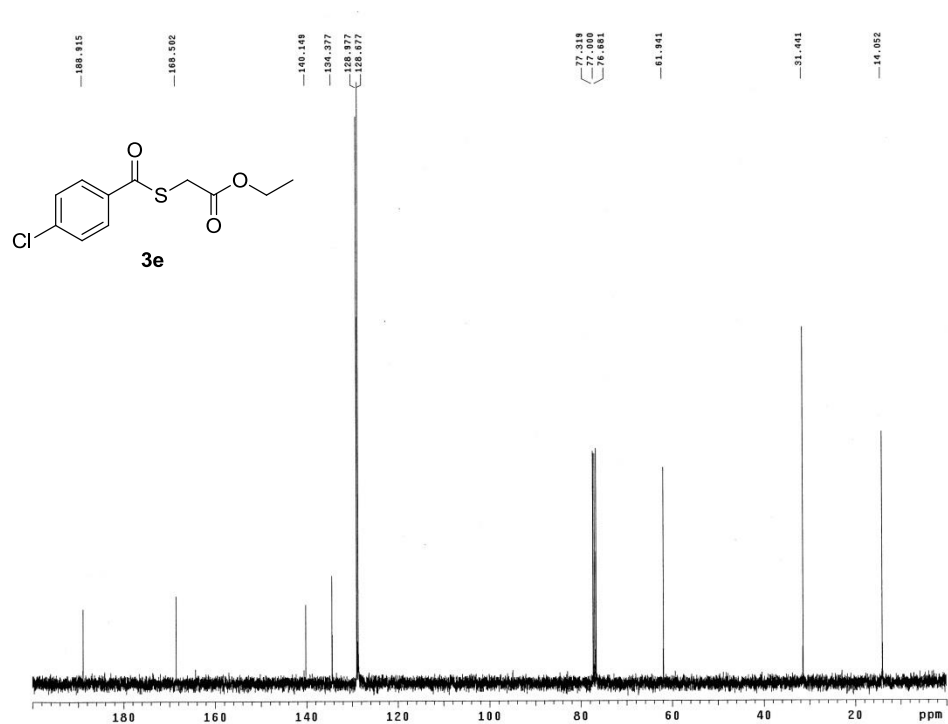

**S-Dodecyl 4-methoxybenzothioate (3f)**

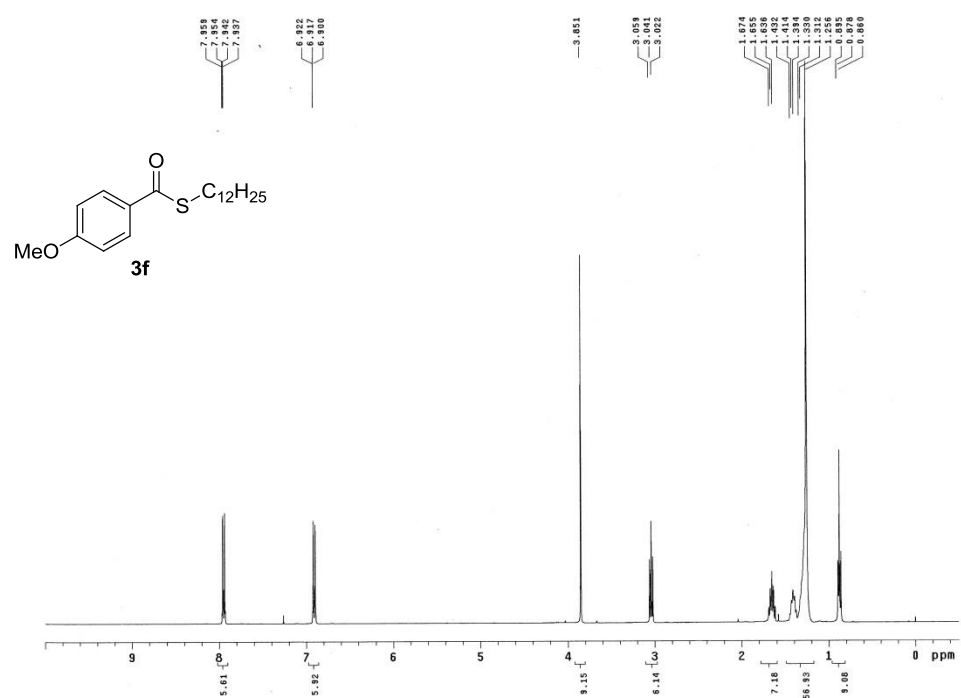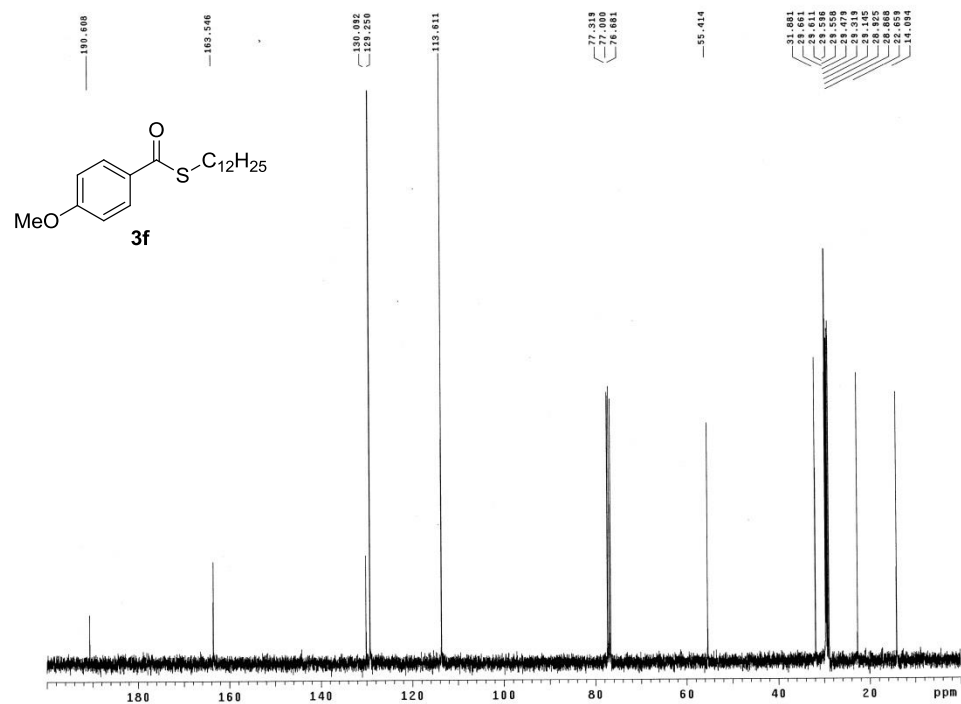





**S-Benzyl 4-methoxybenzothioate (3h)**

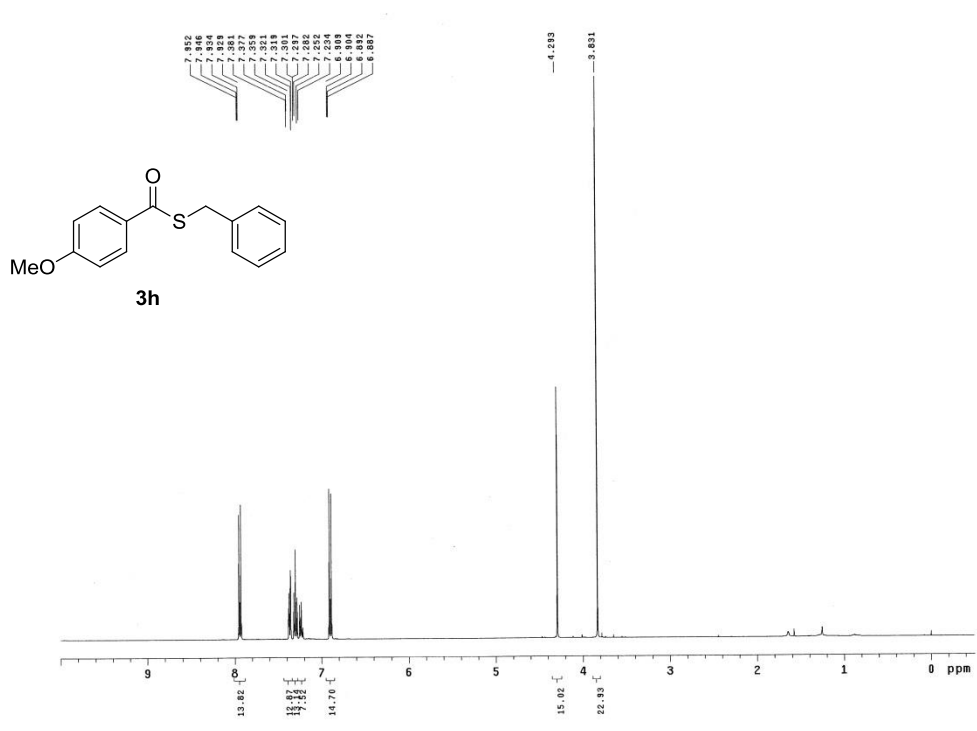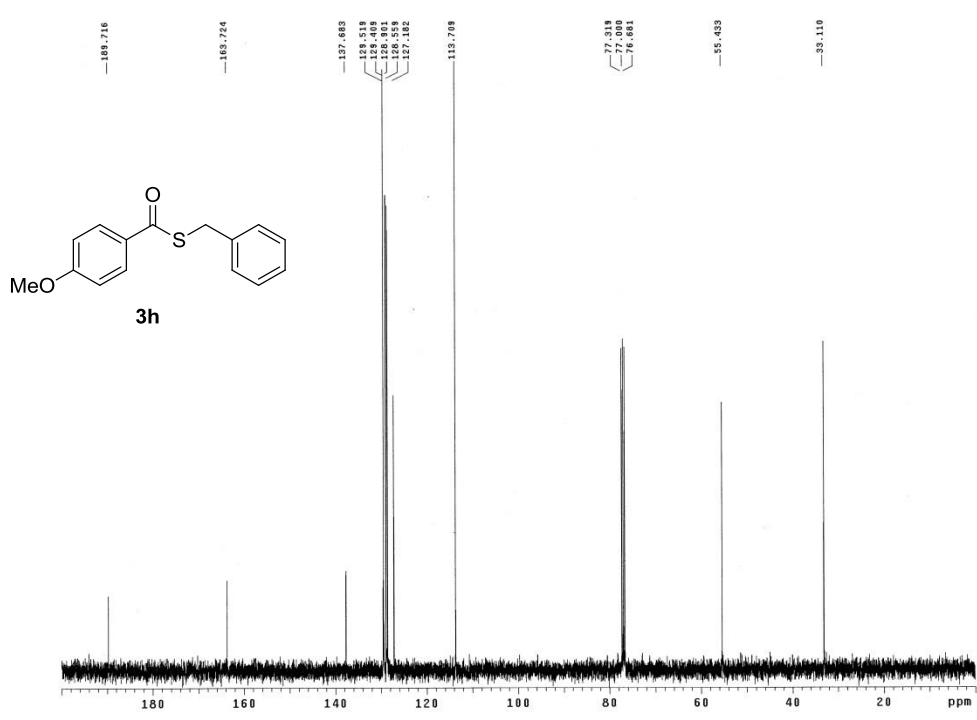

*S*-Dodecyl 2-methylbenzothioate (**3i**)

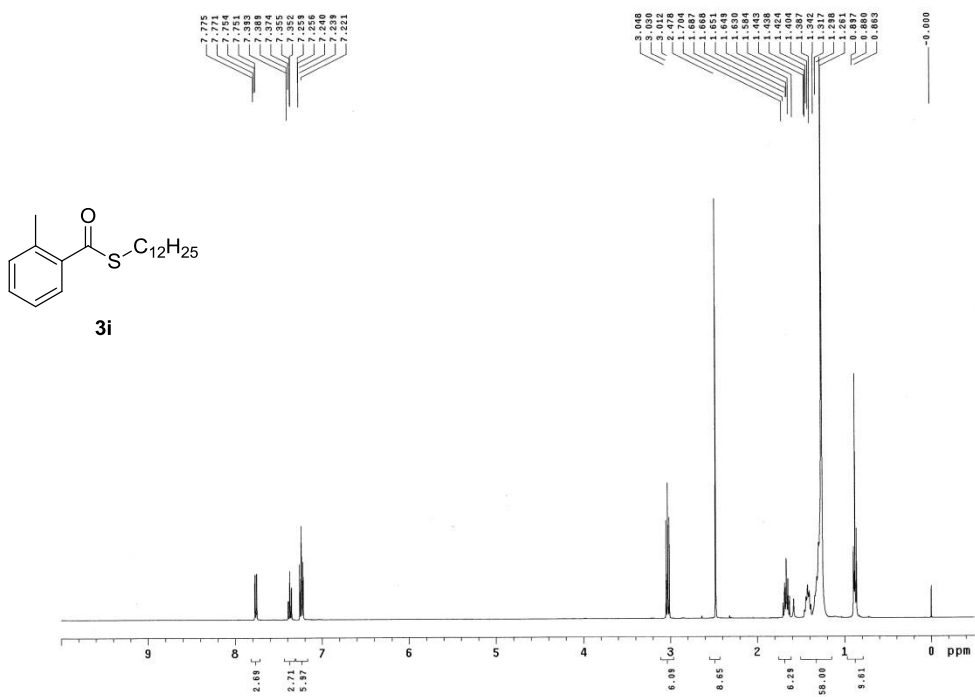





**S-Dodecyl 4-bromobenzothioate (3I)**

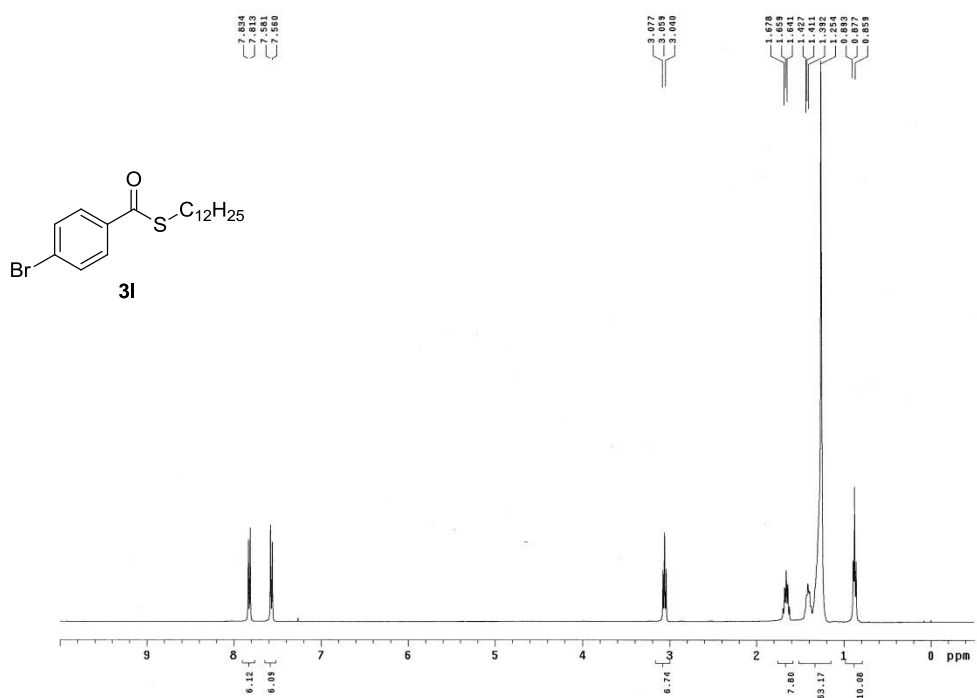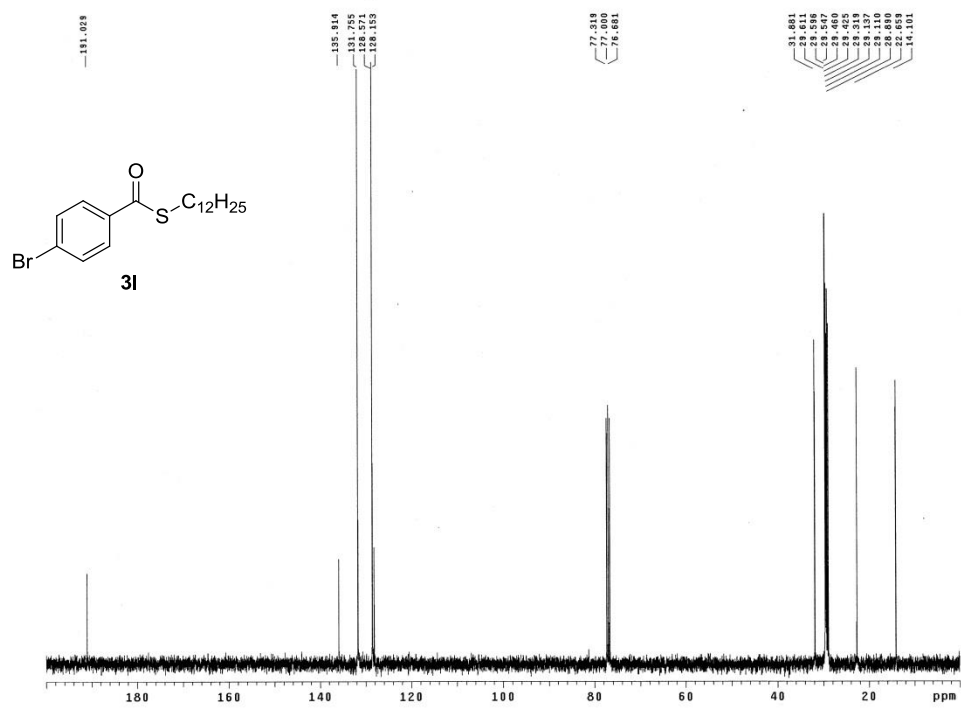

Ethyl 2-((4-bromobenzoyl)thio)acetate (3m)

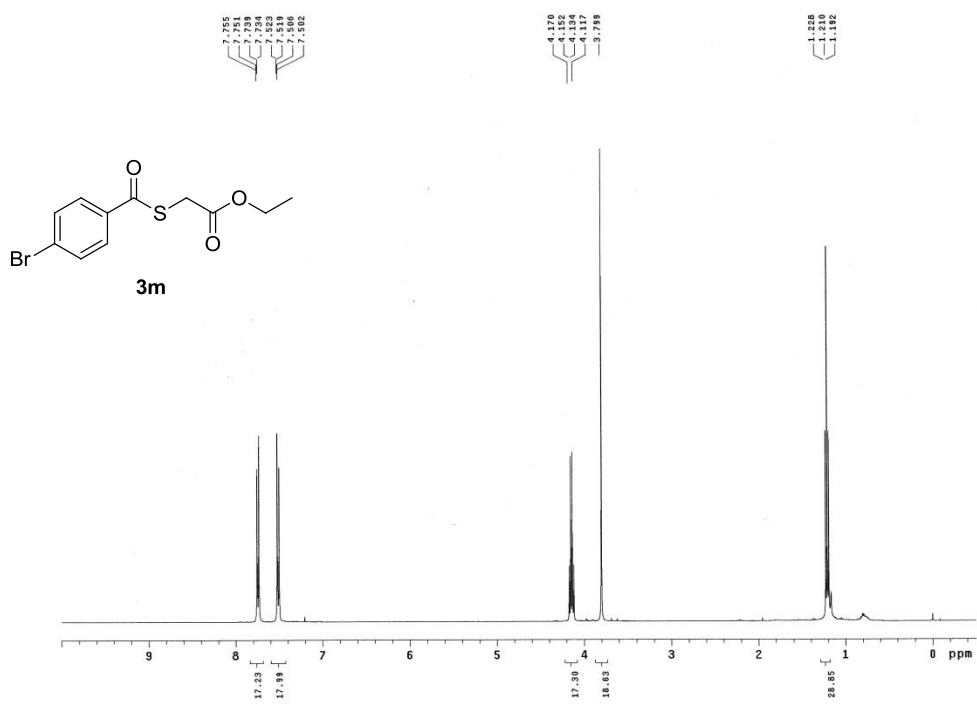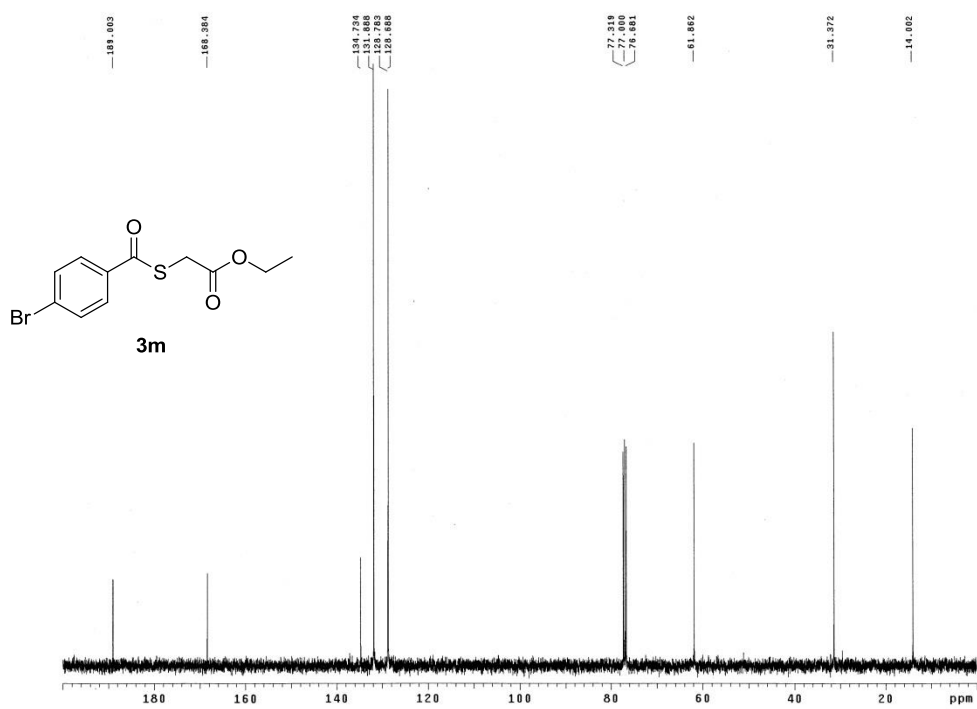





**S-Hexyl 4-methylbenzothioate (3o)**

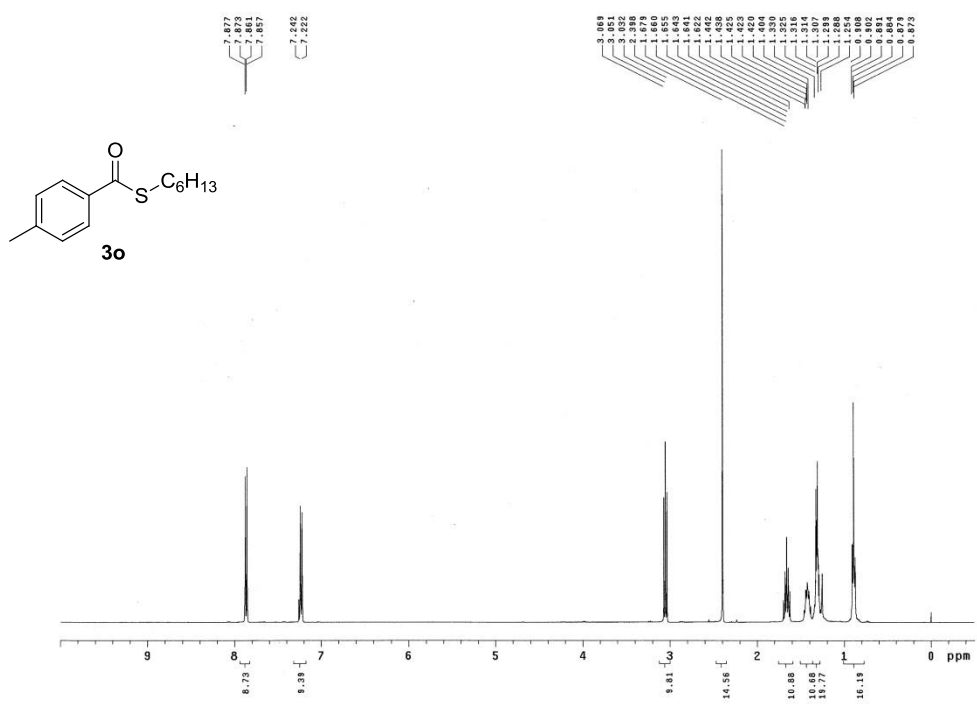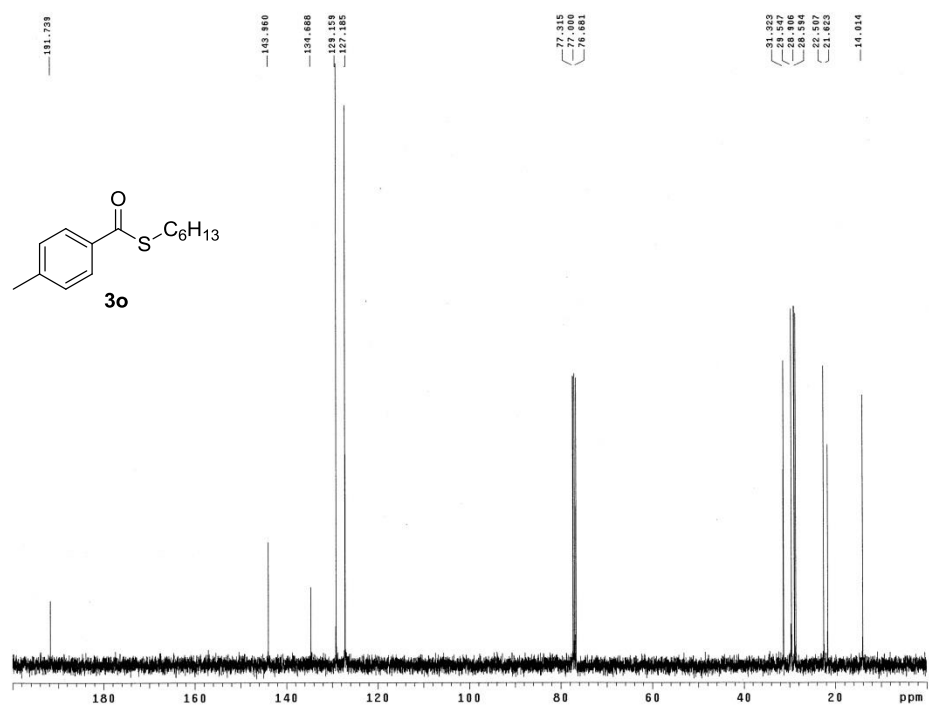

***S*-(2-Methyl-1-butyl) 4-methylbenzothioate (3p)**

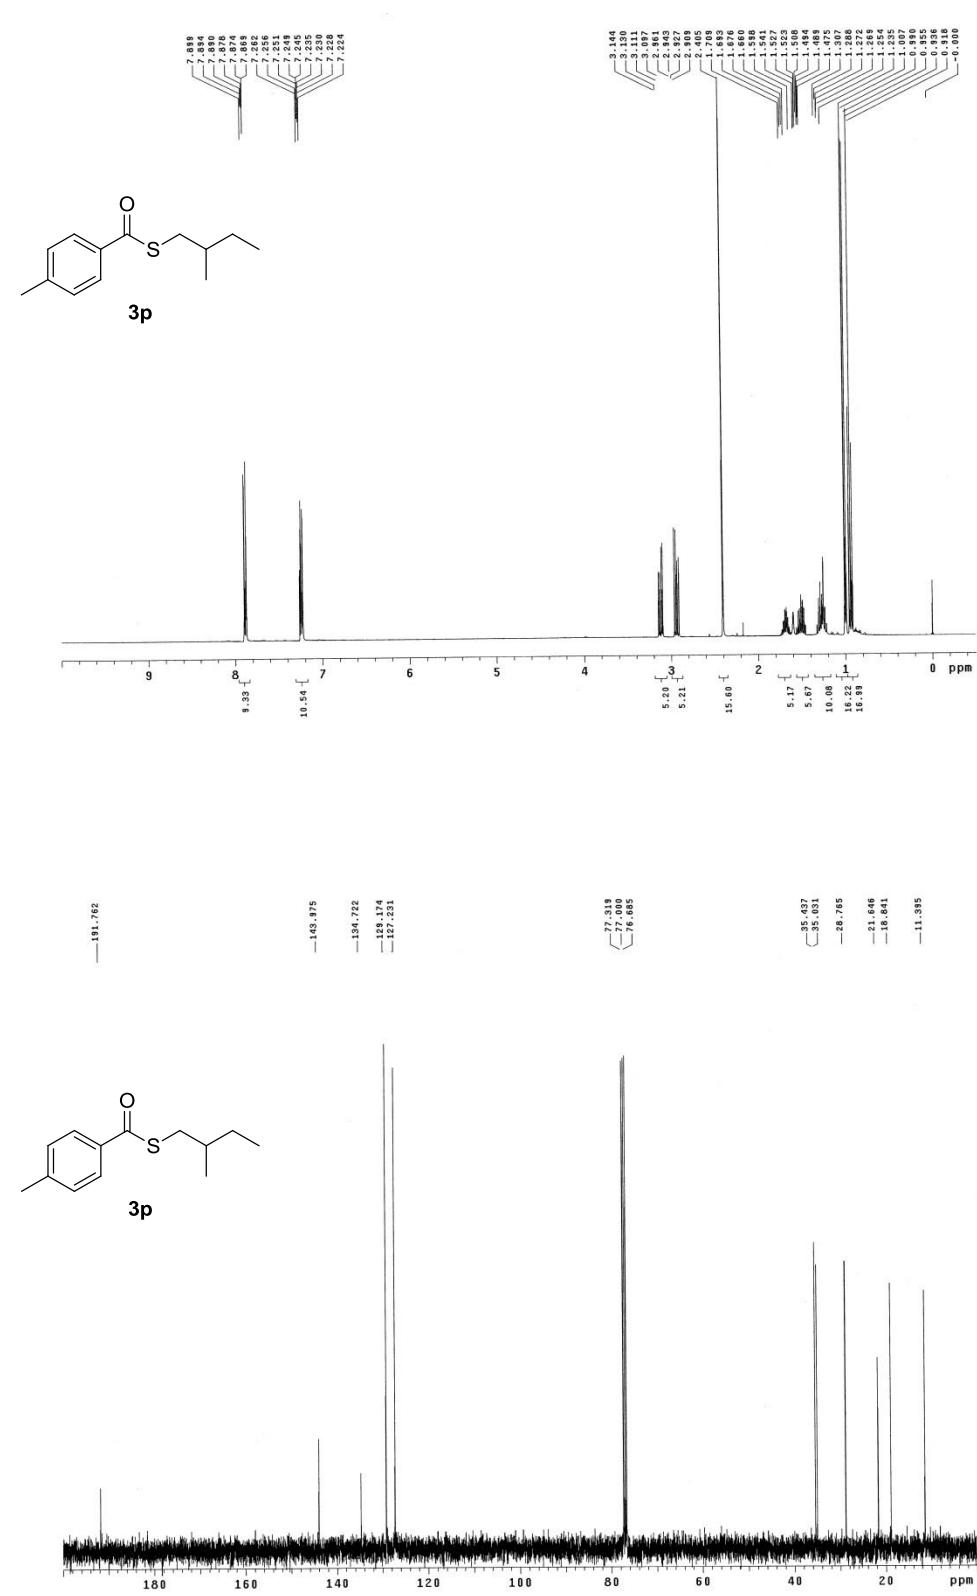



Ethyl 2-((3-methylbenzoyl)thio)acetate (3r)

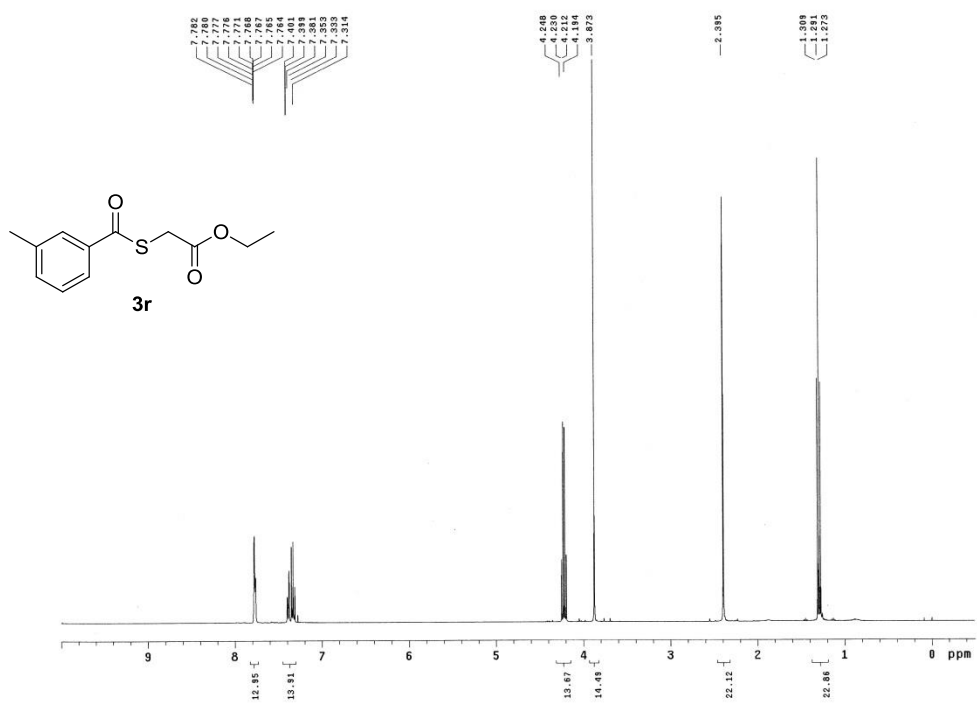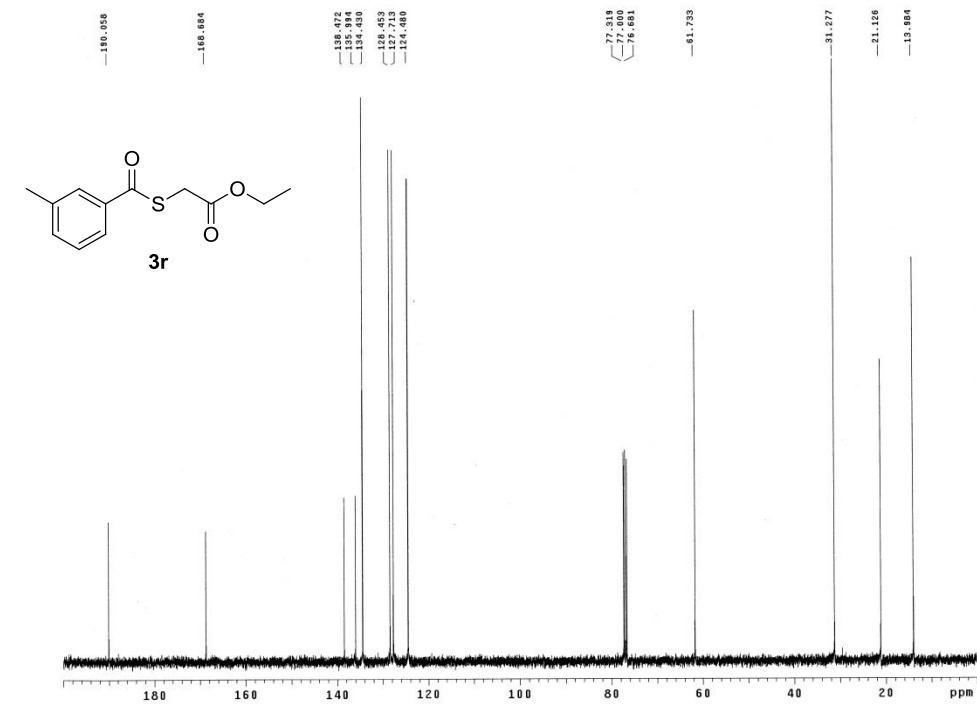

**S-Hexyl 4-(trifluoromethyl)benzothioate (3s)**

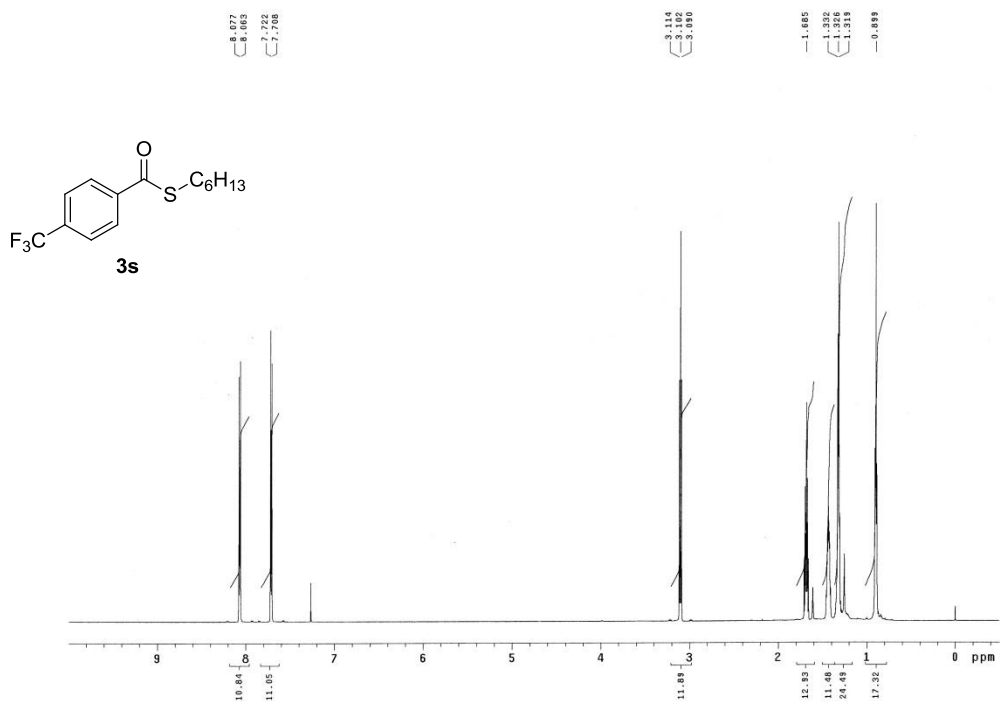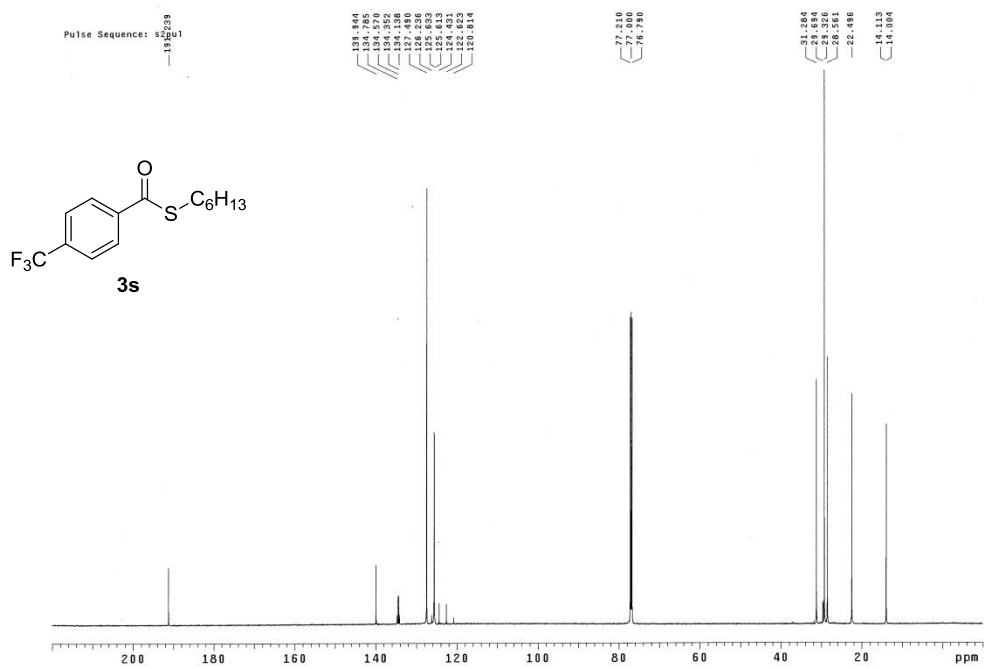

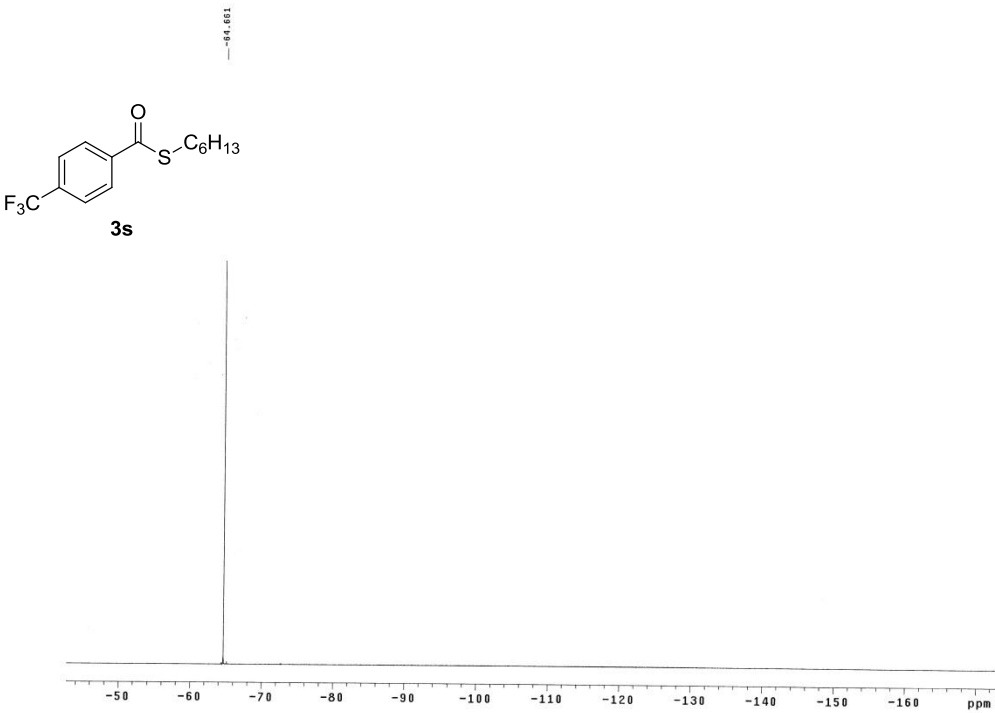



**S-Dodecyl heptanethioate (3u)**

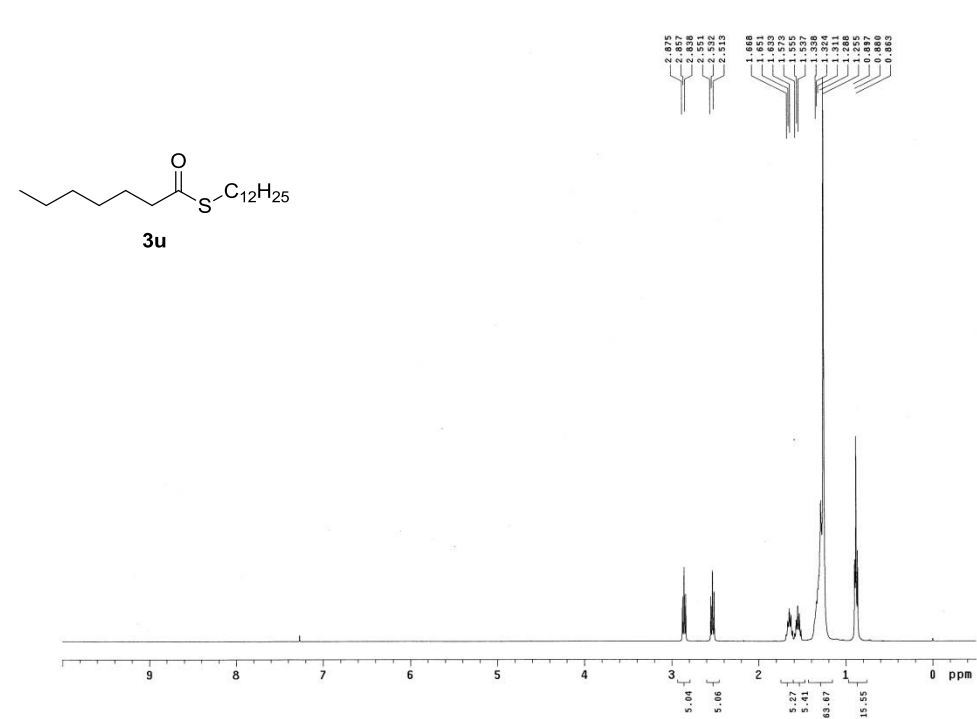



***S*-(2-Methyl-1-butyl) heptanethioate (3v)**

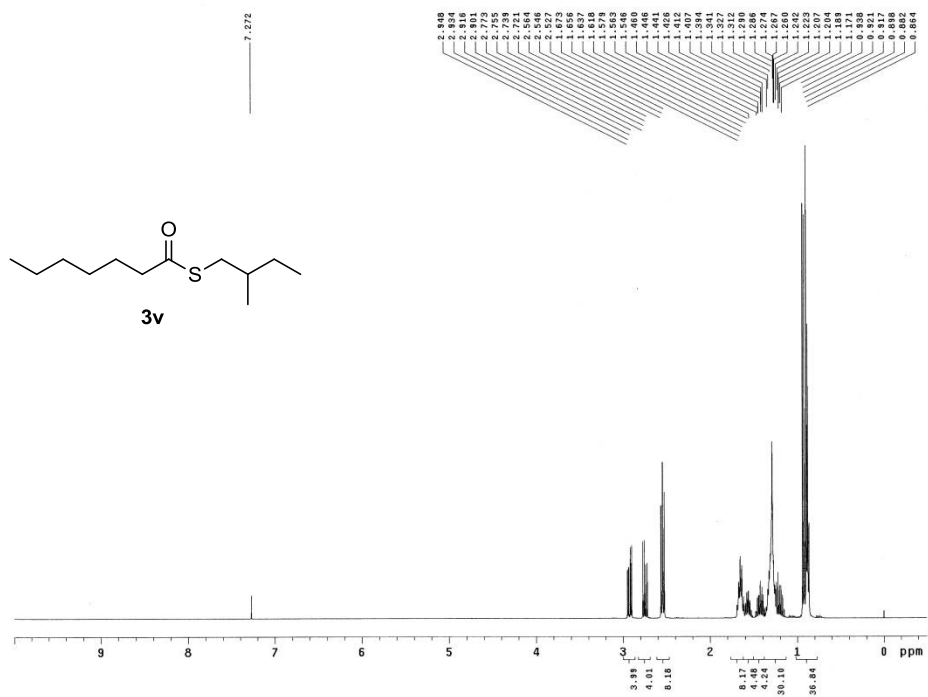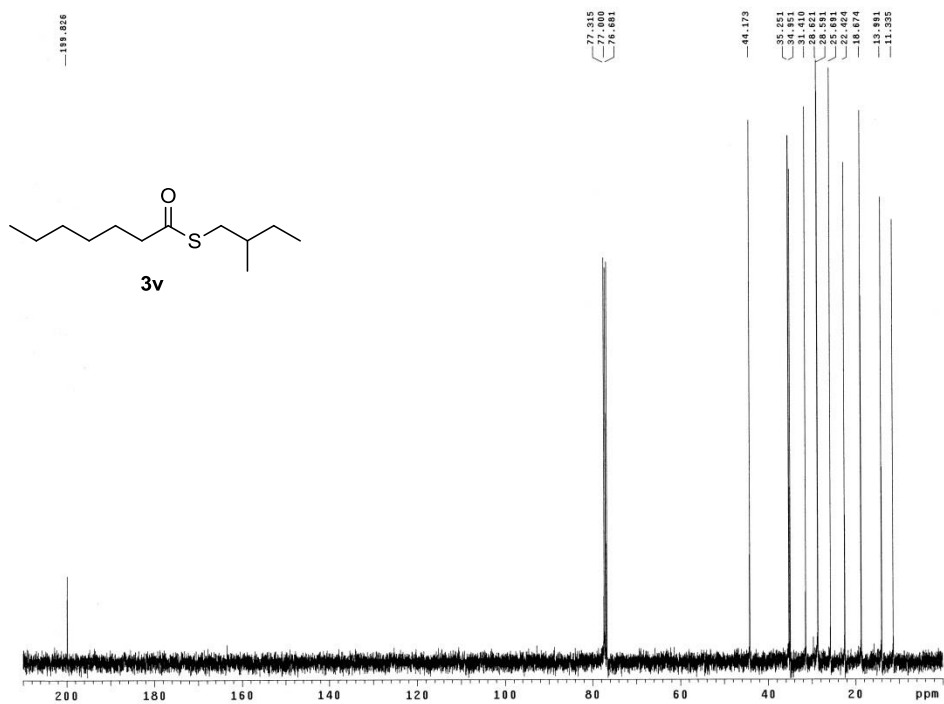

***S*-(4-Chlorophenyl) 4-methoxybenzothioate (4a)**

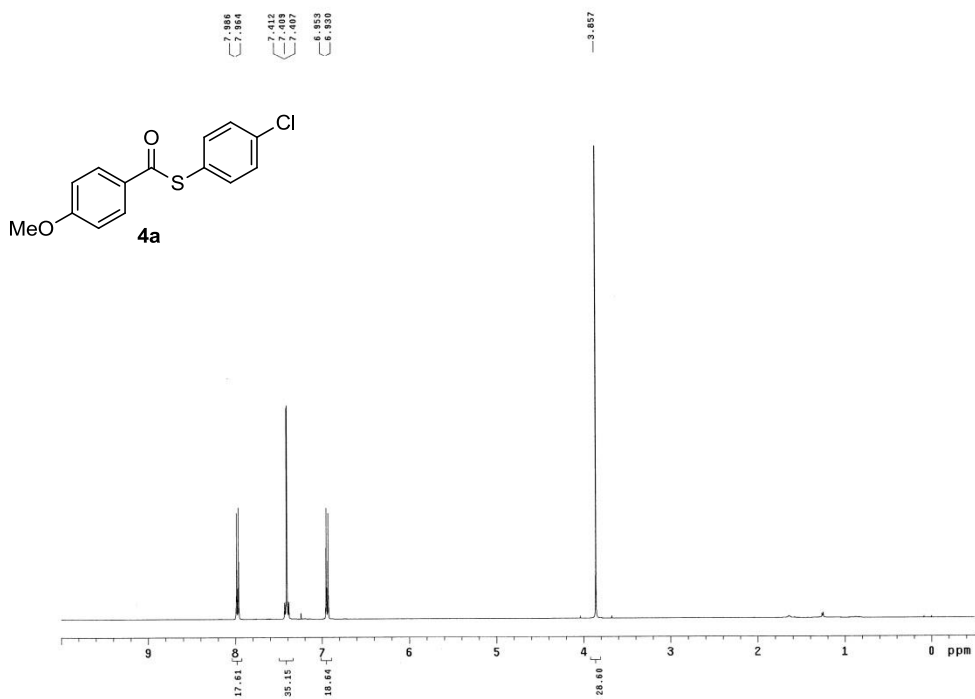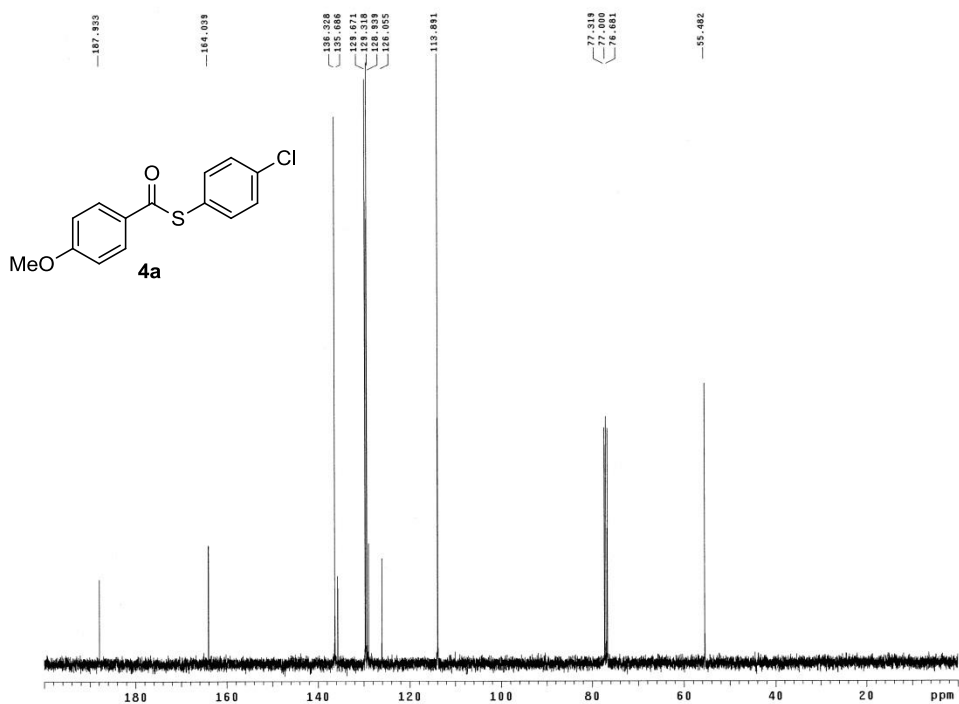

***S*-(4-(Trifluoromethyl)phenyl) 4-methoxybenzothioate (4b)**

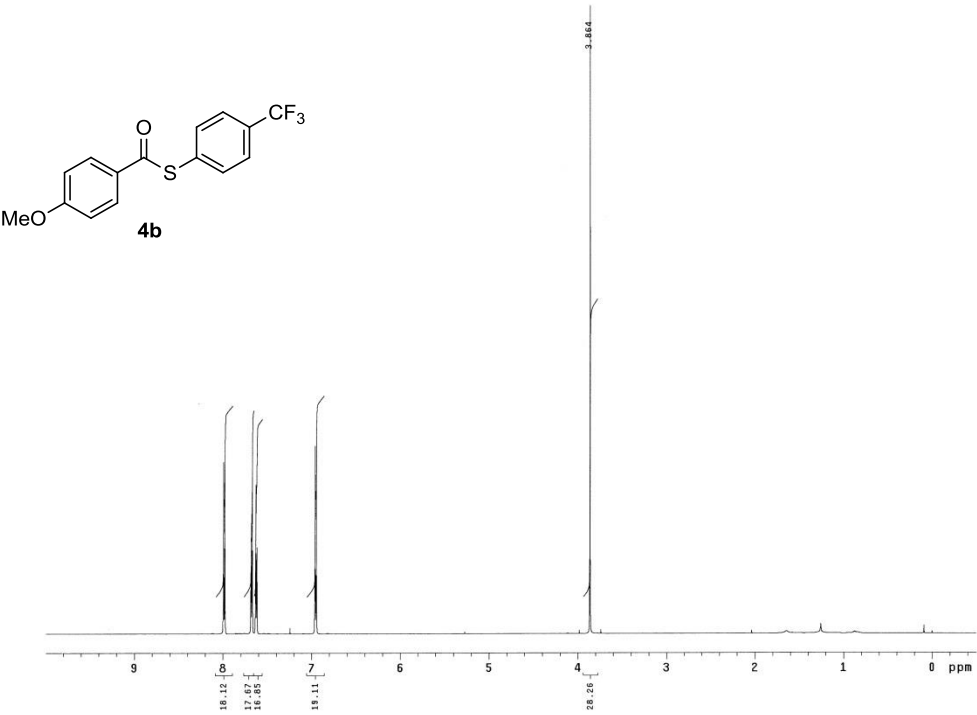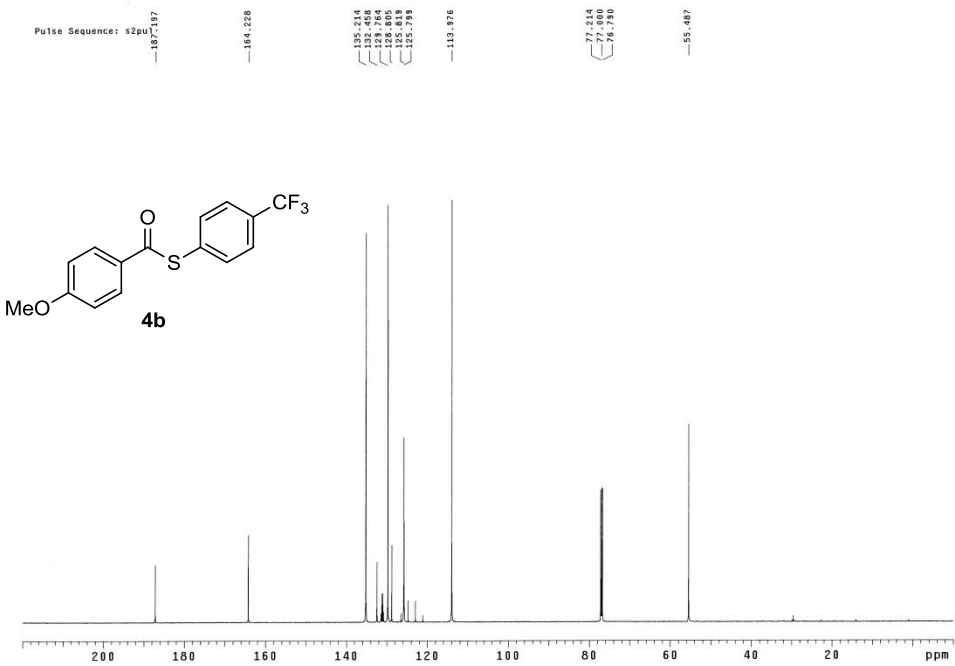

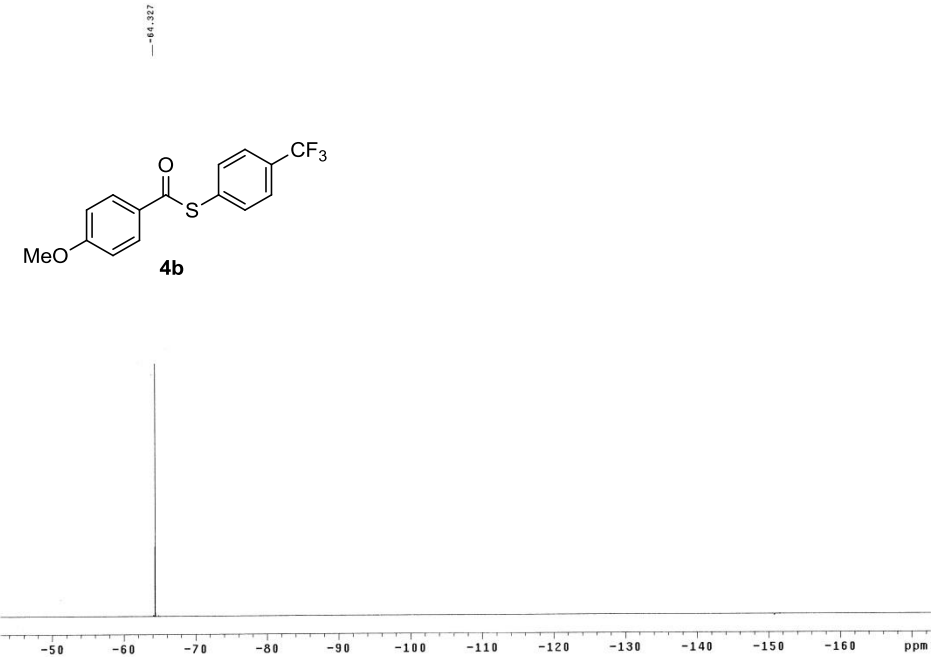

***S*-(4-Fluorophenyl) 4-methoxybenzothioate (4c)**

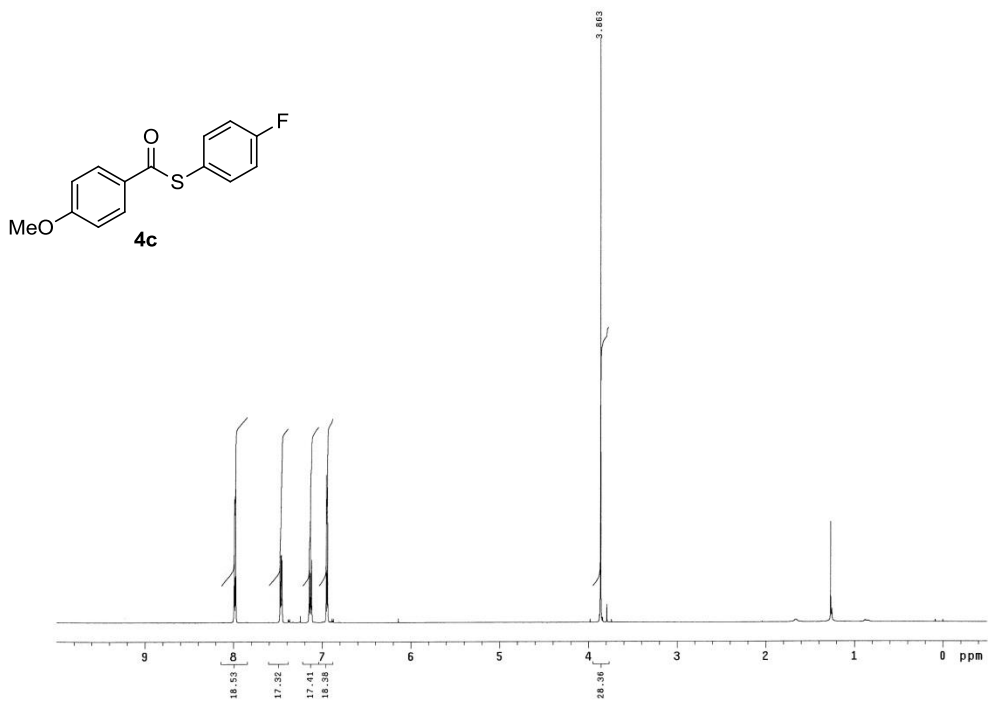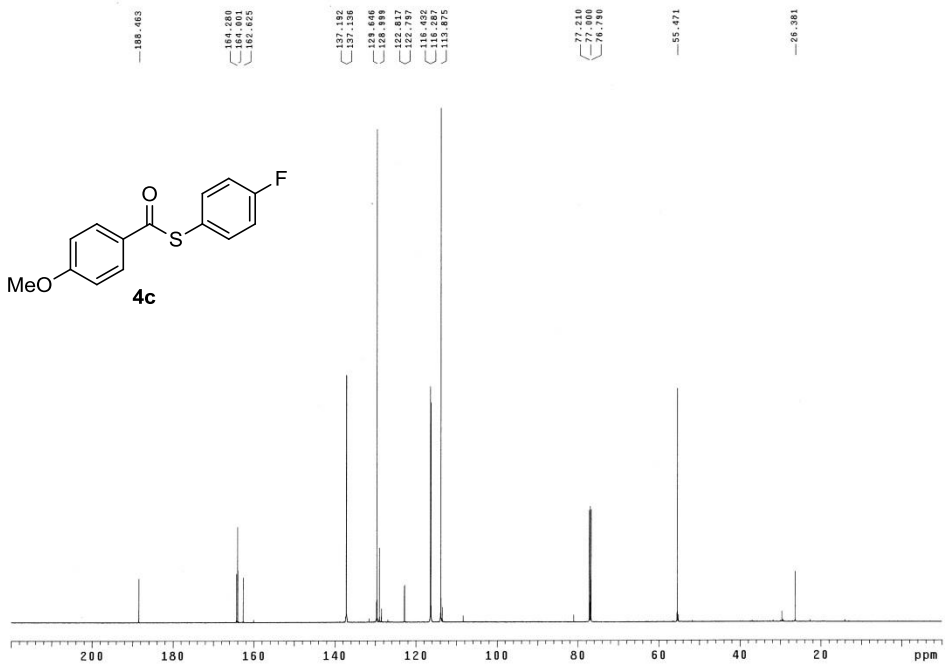

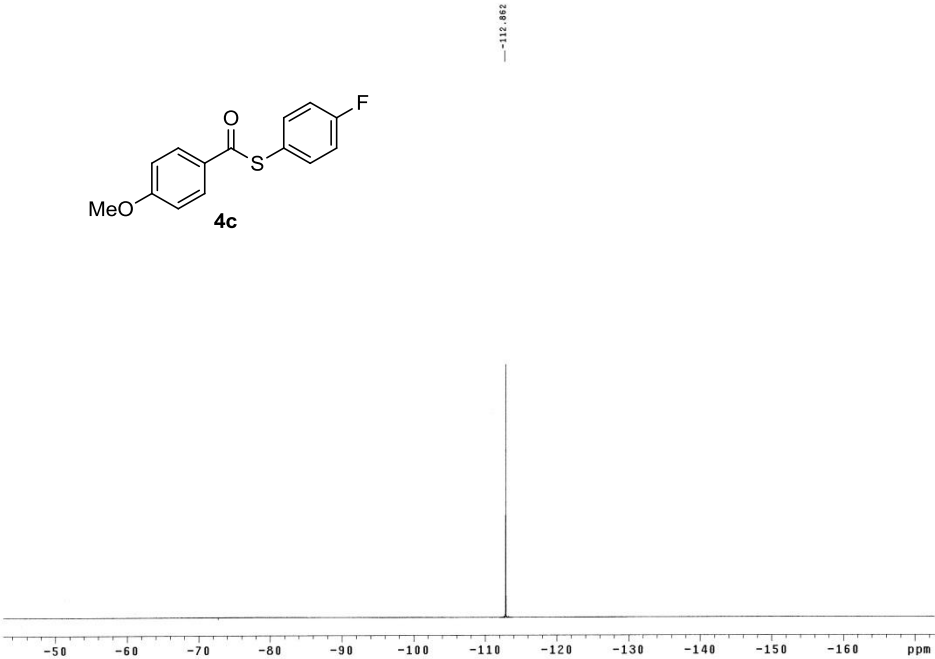

***S*-(4-Bromophenyl) 4-methoxybenzothioate (4d)**

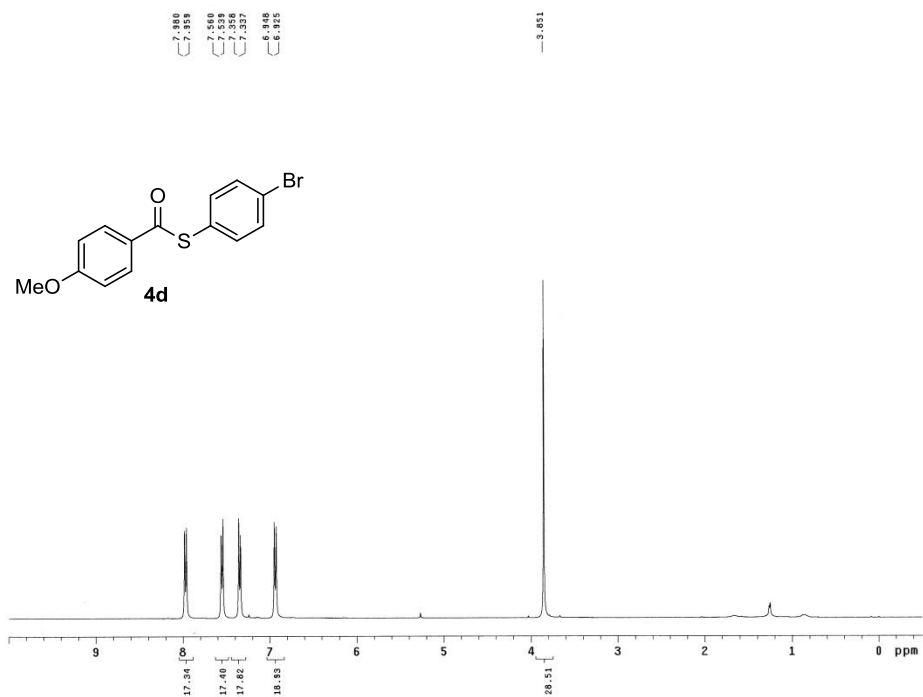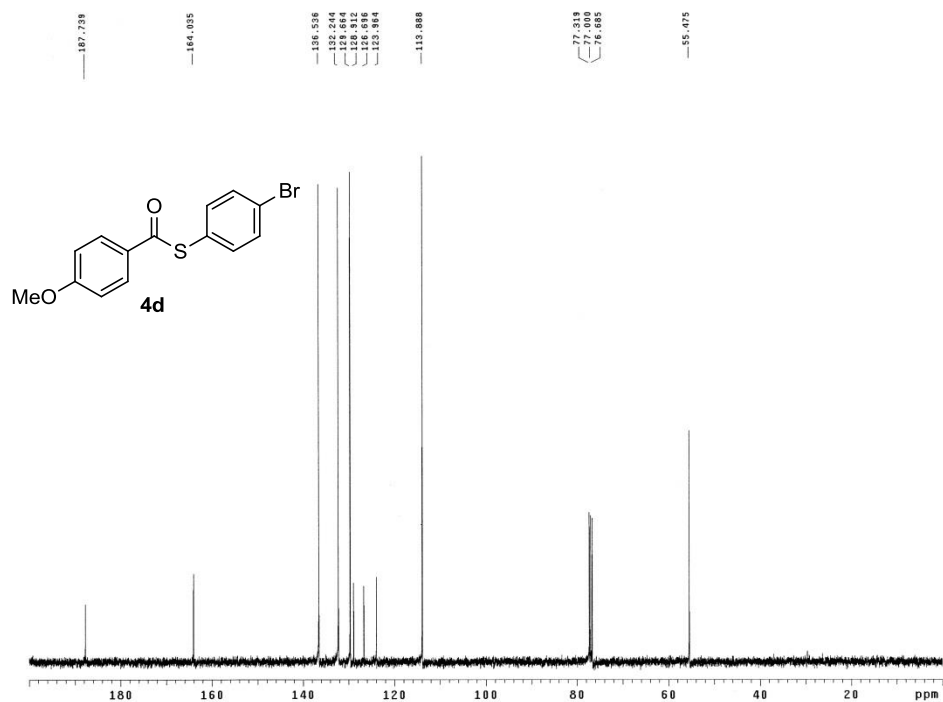





***S*-(4-Chlorophenyl) 4-chlorobenzothioate (4f)**

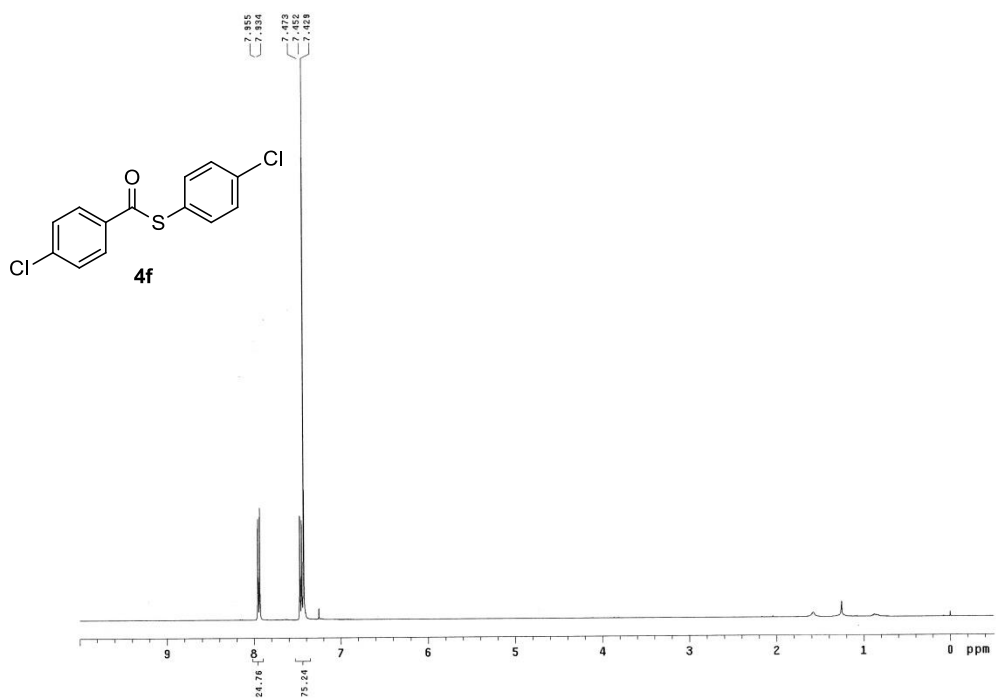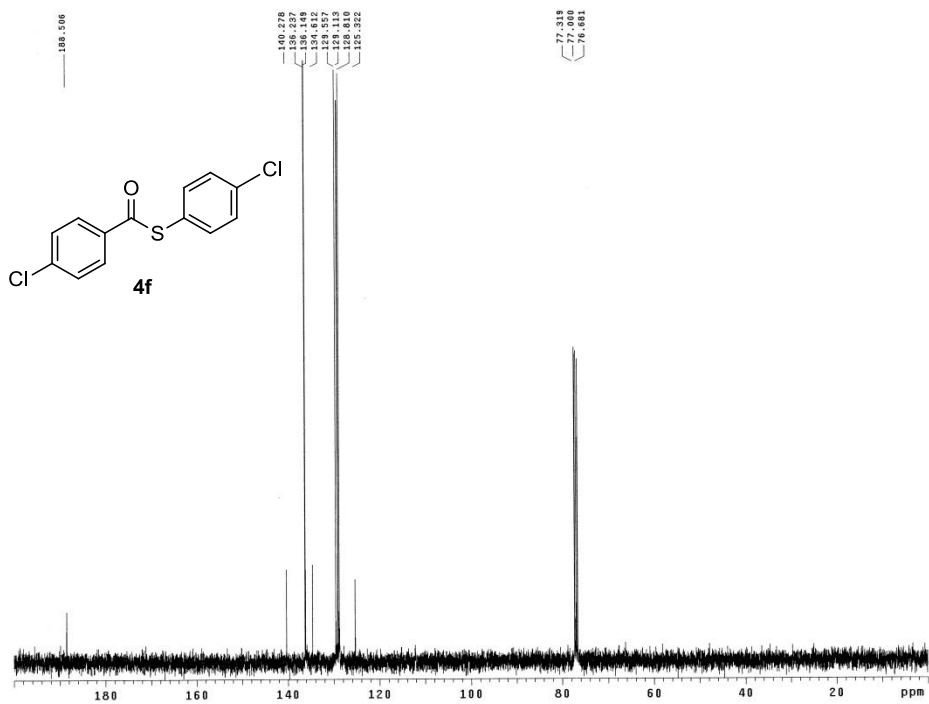



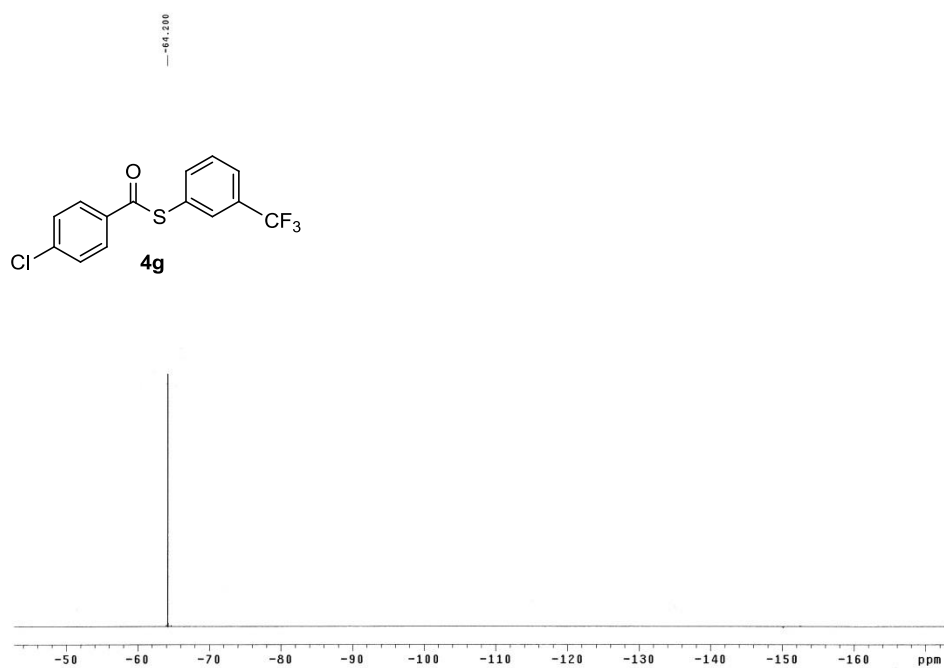

**S-(4-Chlorophenyl) 2-methylbenzothioate (4h)**

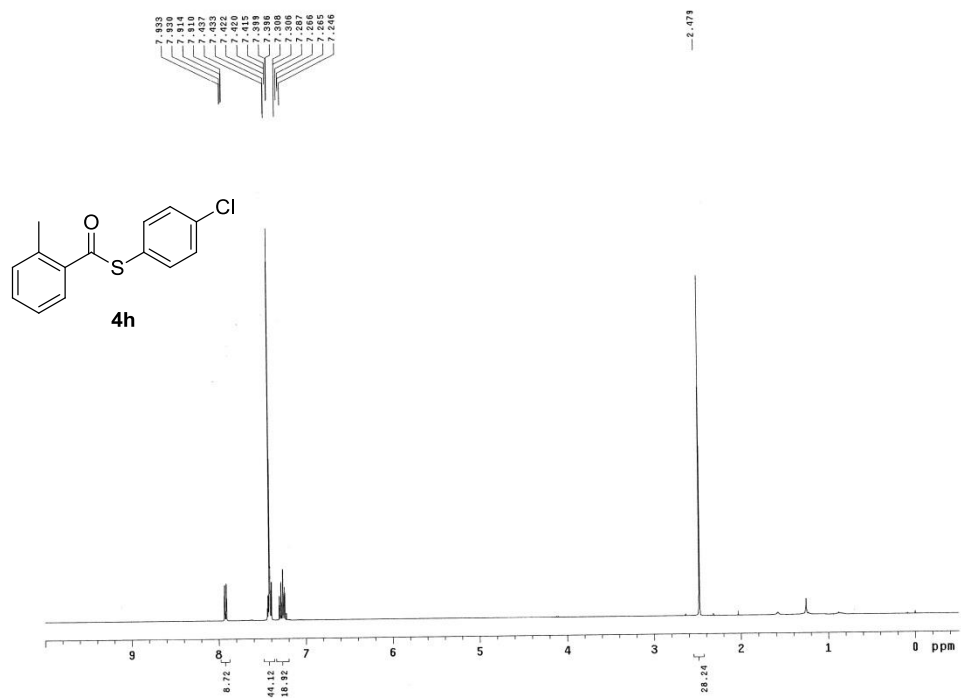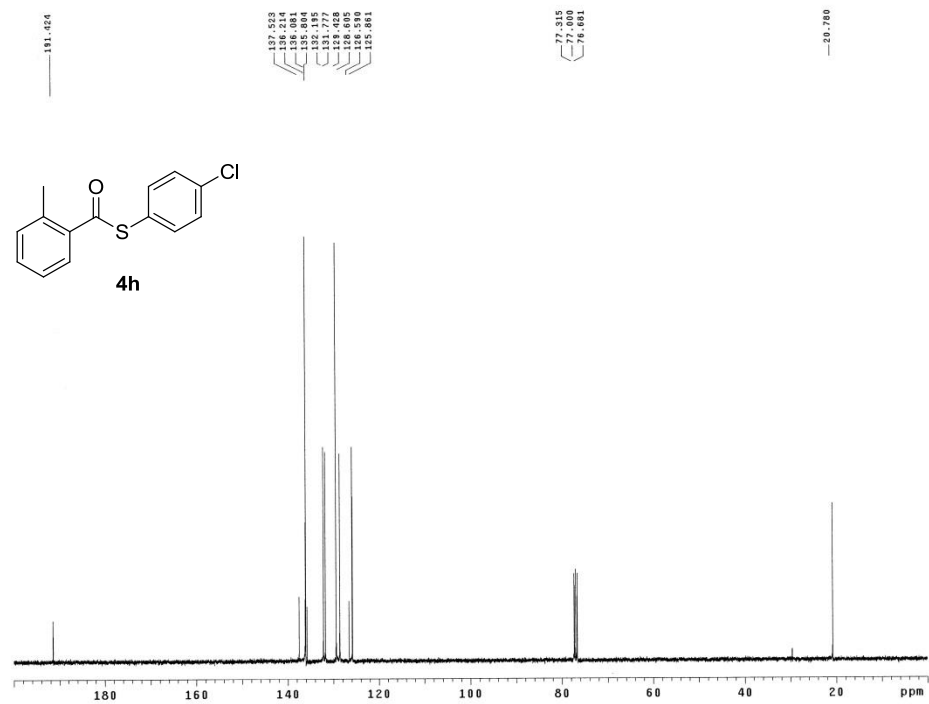





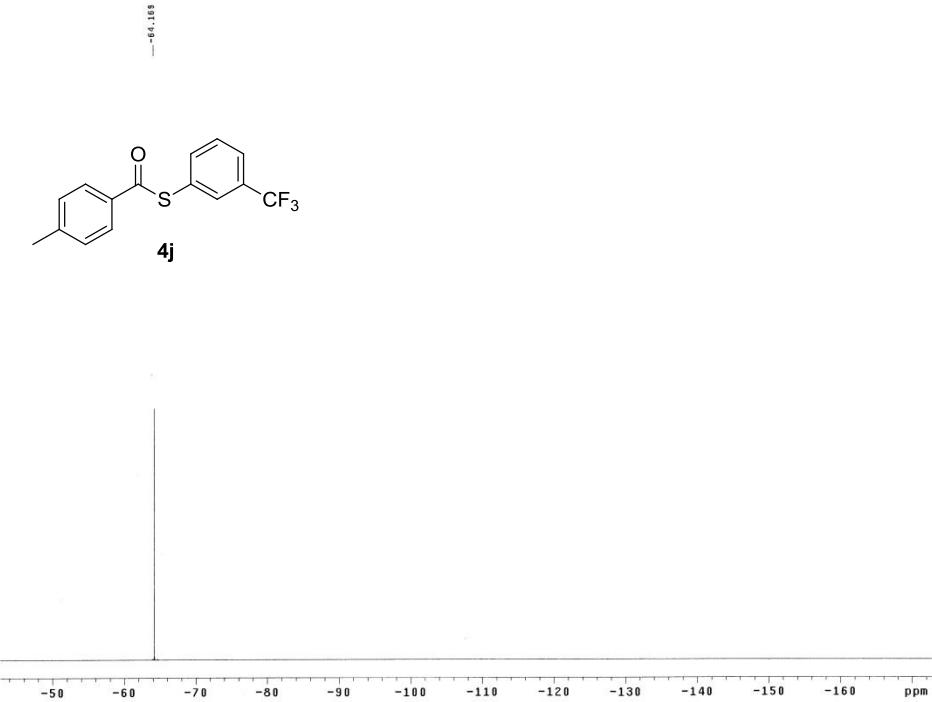

***S*-(4-Chlorophenyl) 4-bromobenzothioate (4k)**

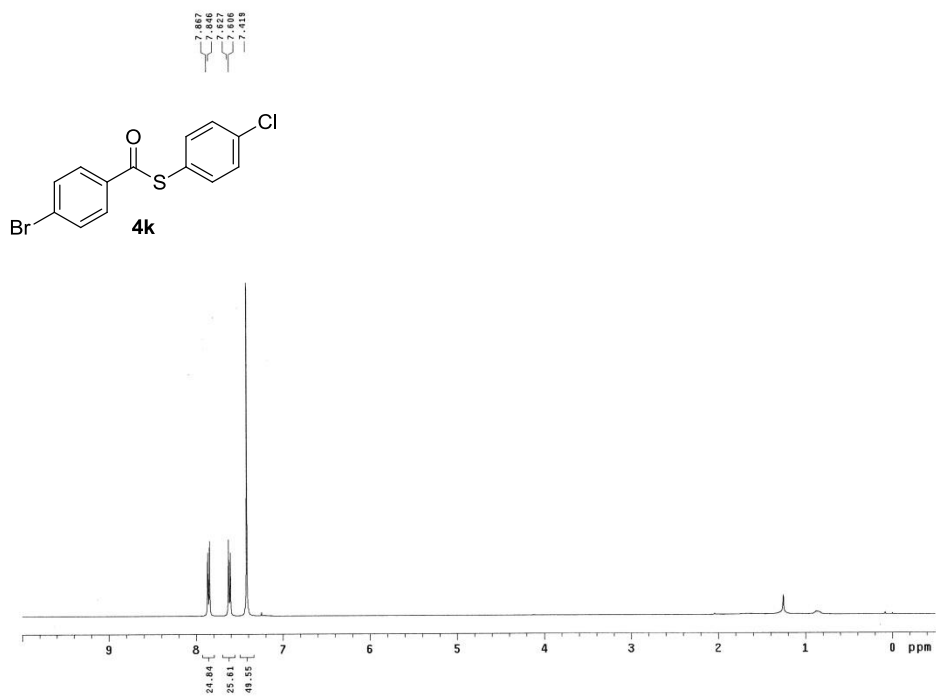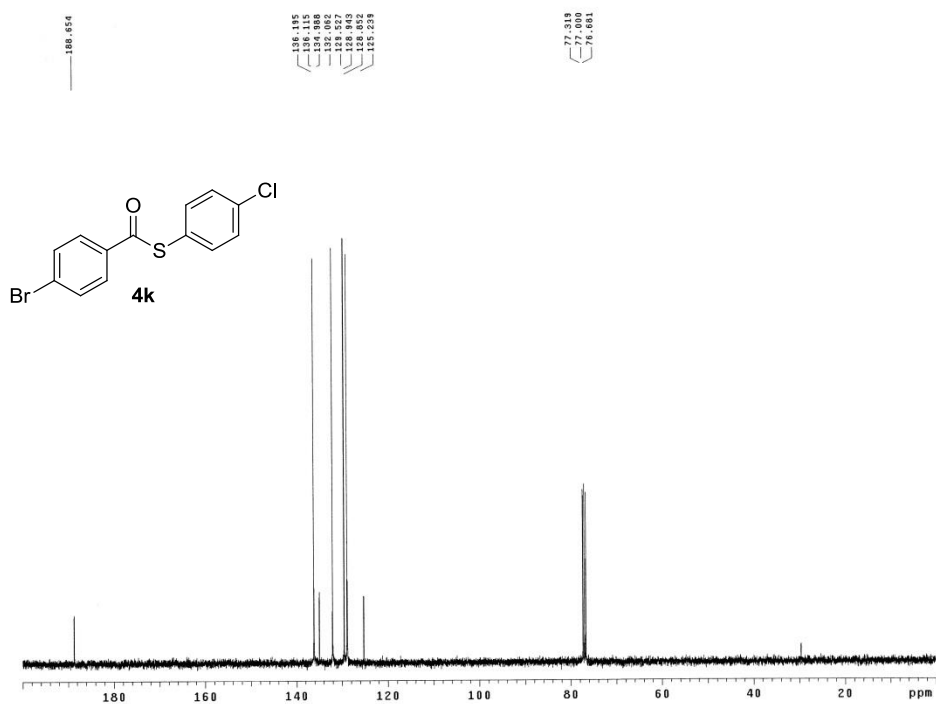



**S-(4-Bromophenyl) 3-cyanobenzothioate (4l)**

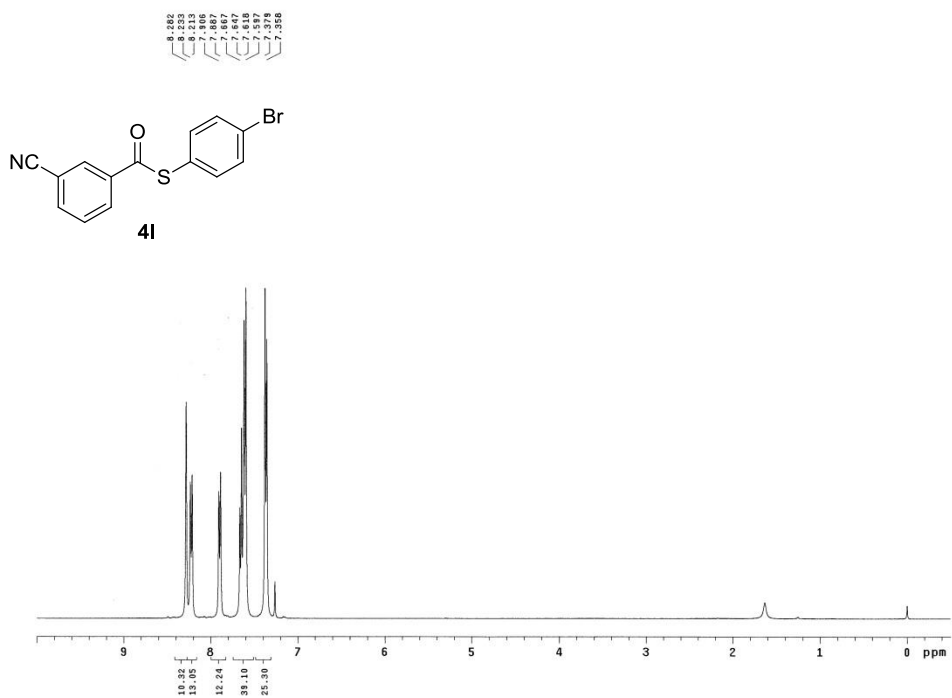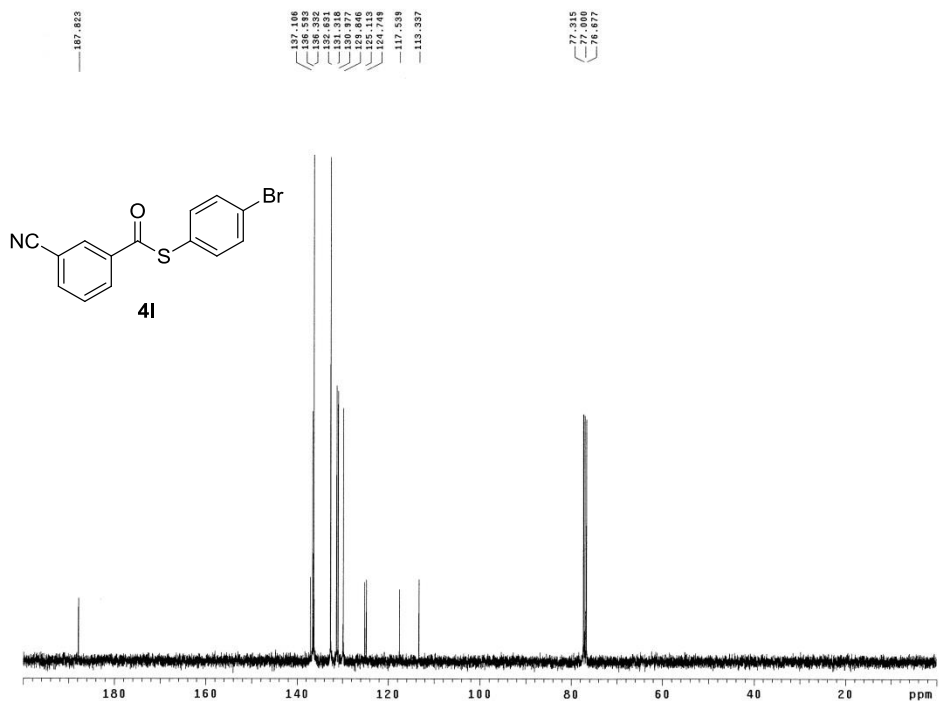

*S-p*-Tolyl 3-cyanobenzothioate (**4m**)

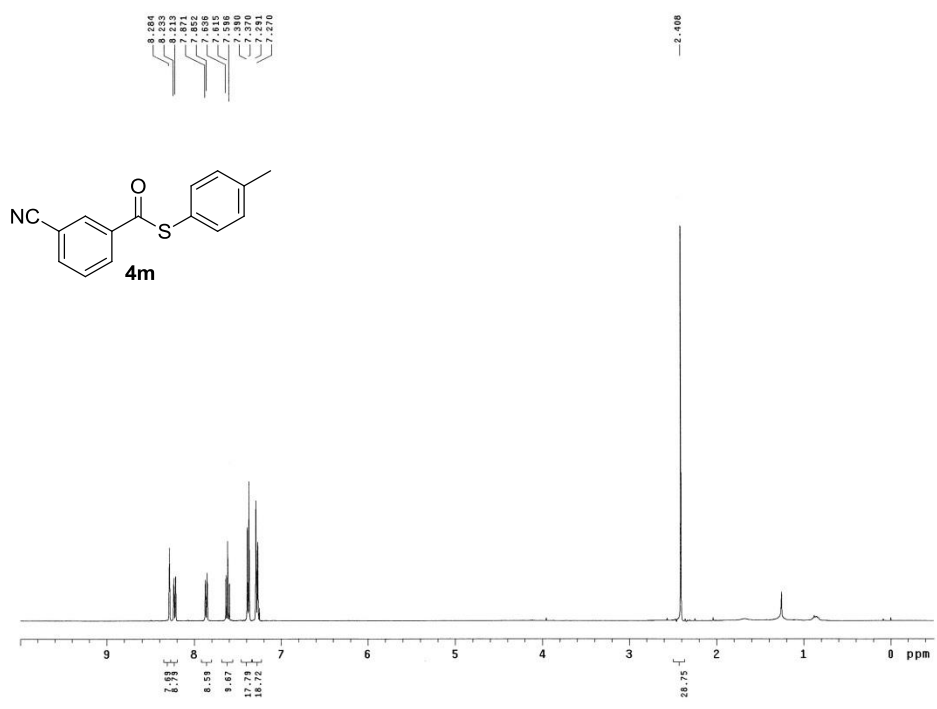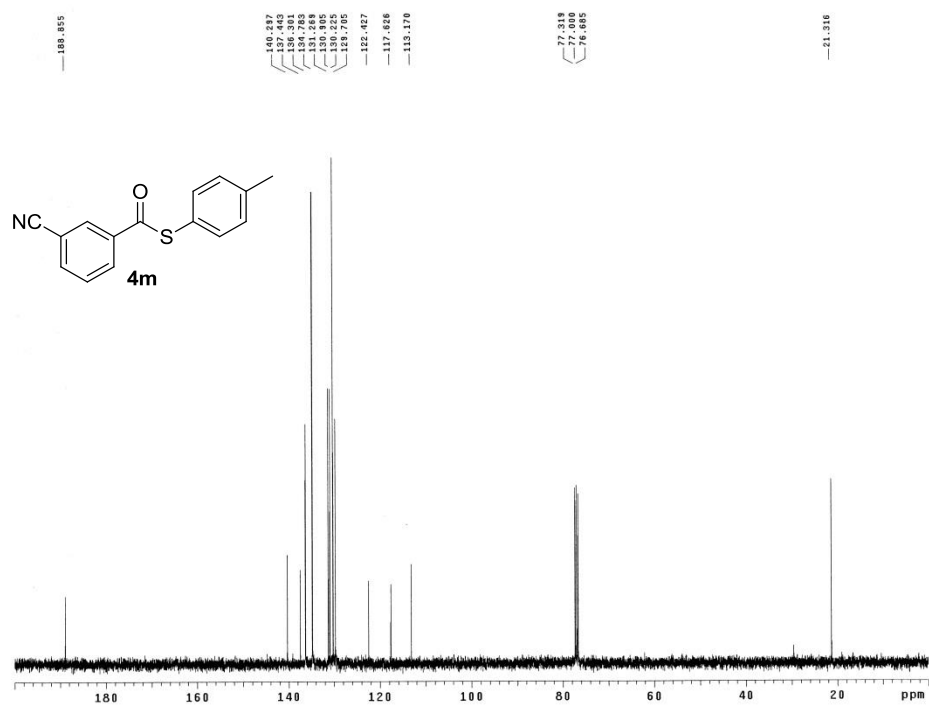

***S*-(4-Methoxyphenyl) 4-(tert-butyl)benzothioate (4n)**

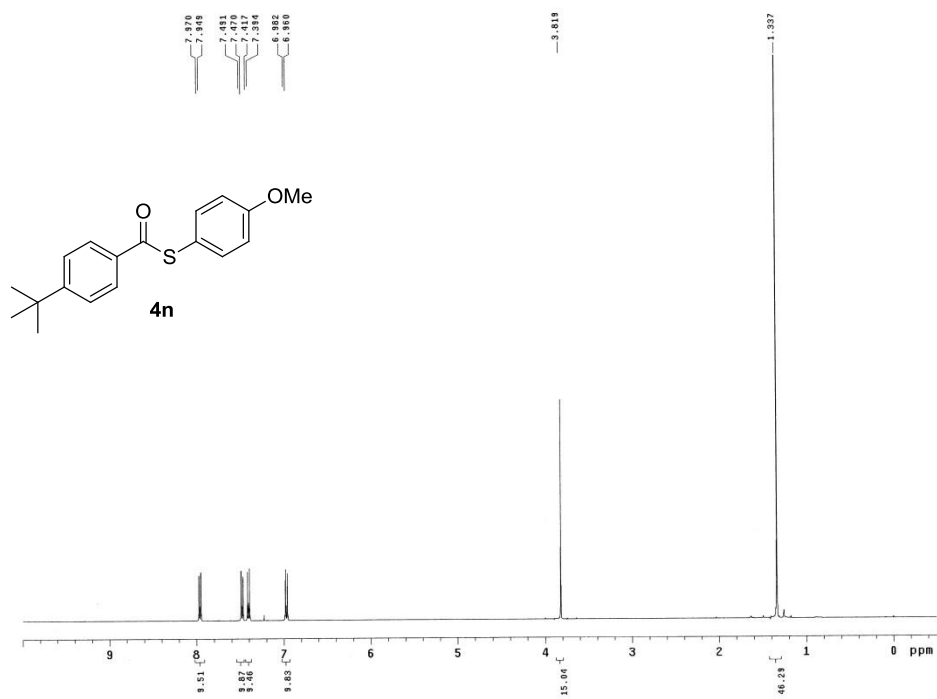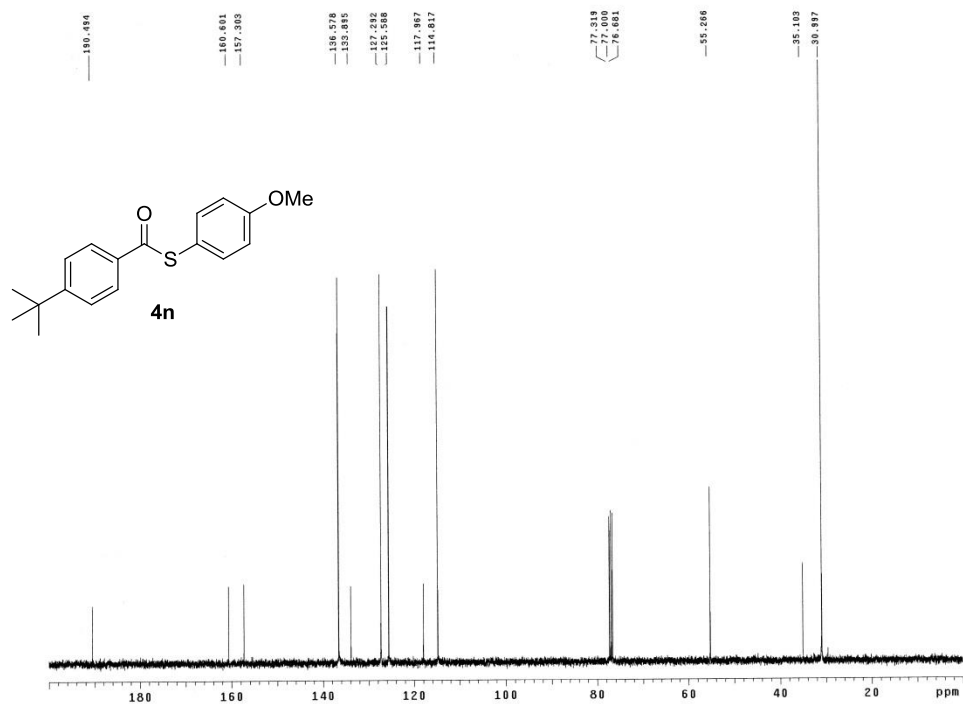

*S-p*-Tolyl heptanethioate (**4o**)

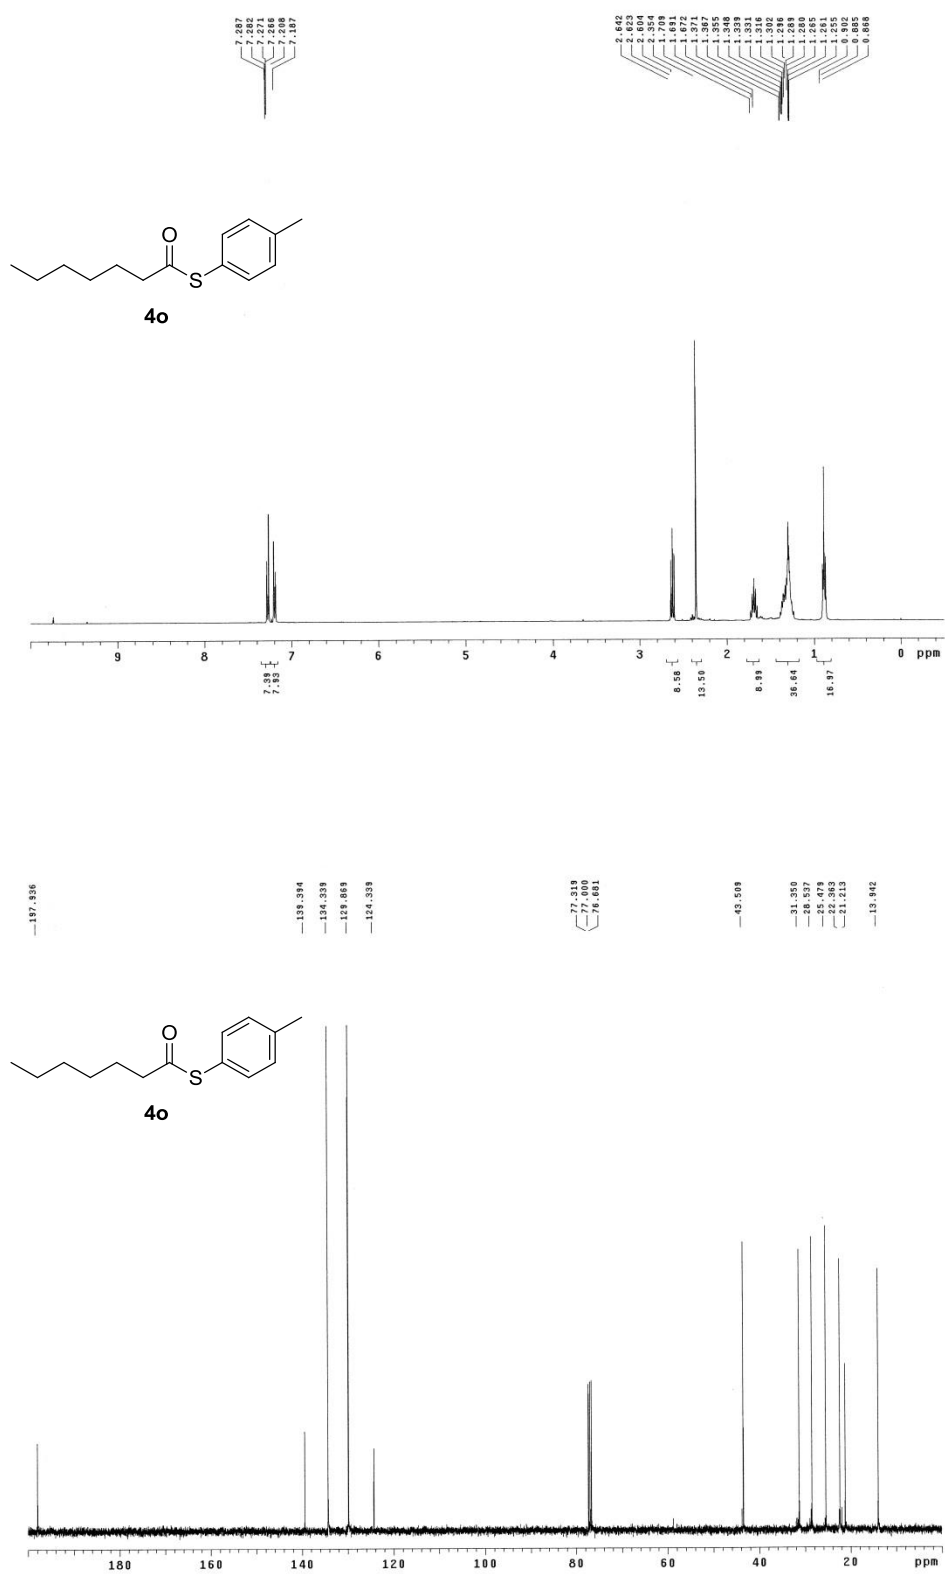

*S*-*o*-Tolyl heptanethioate (4p)

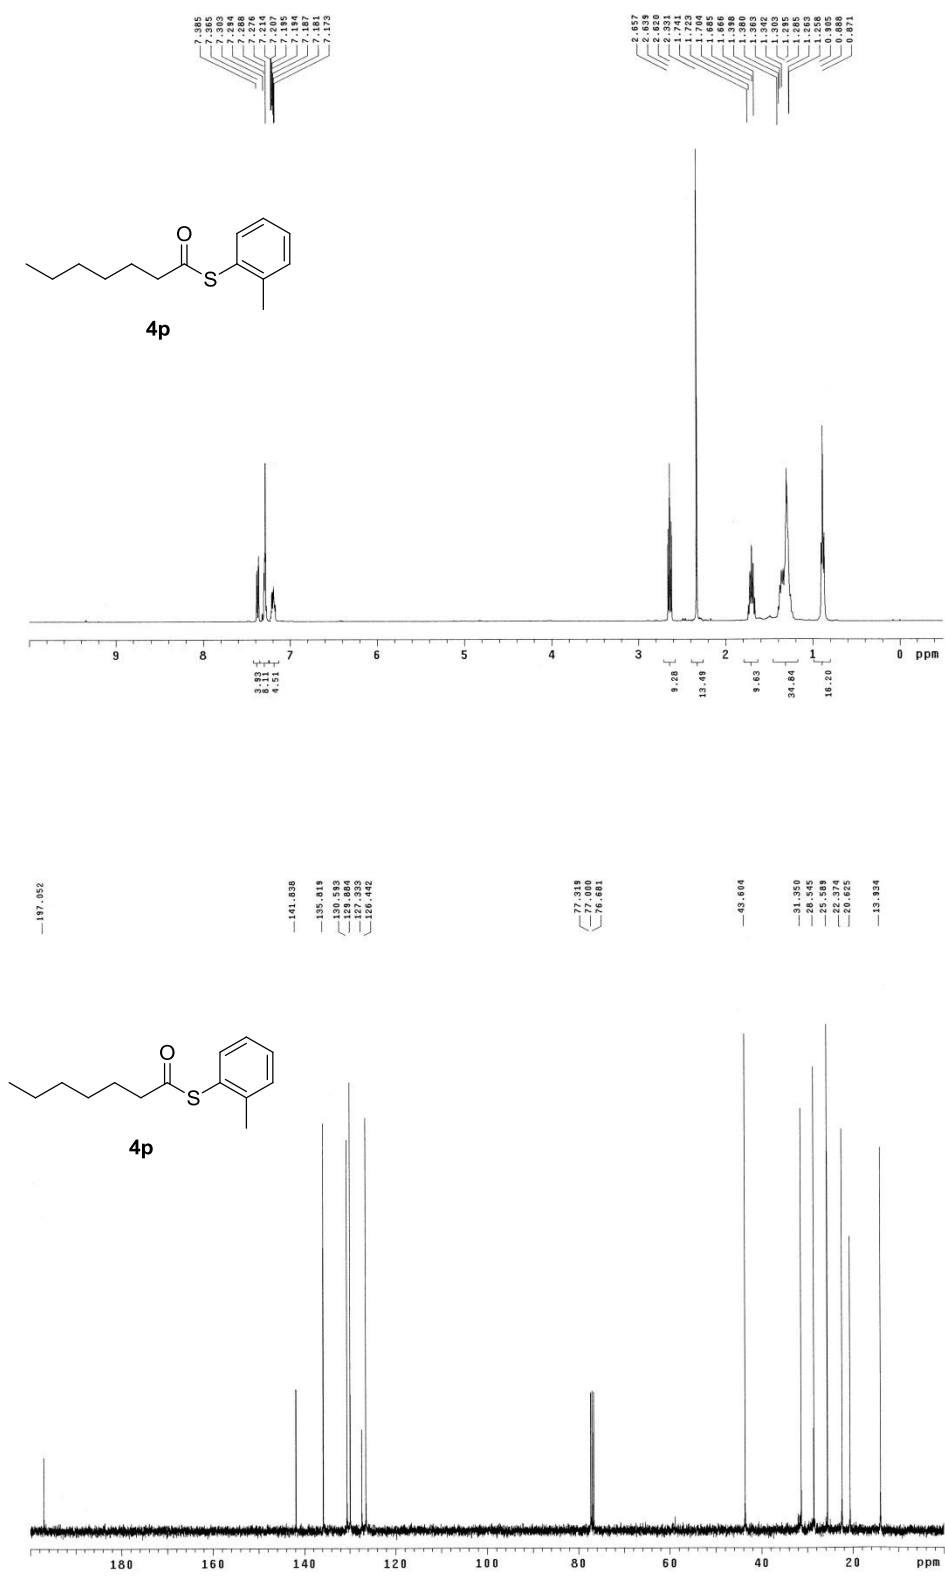

***S*-(4-Chlorophenyl) heptanethioate (4q)**

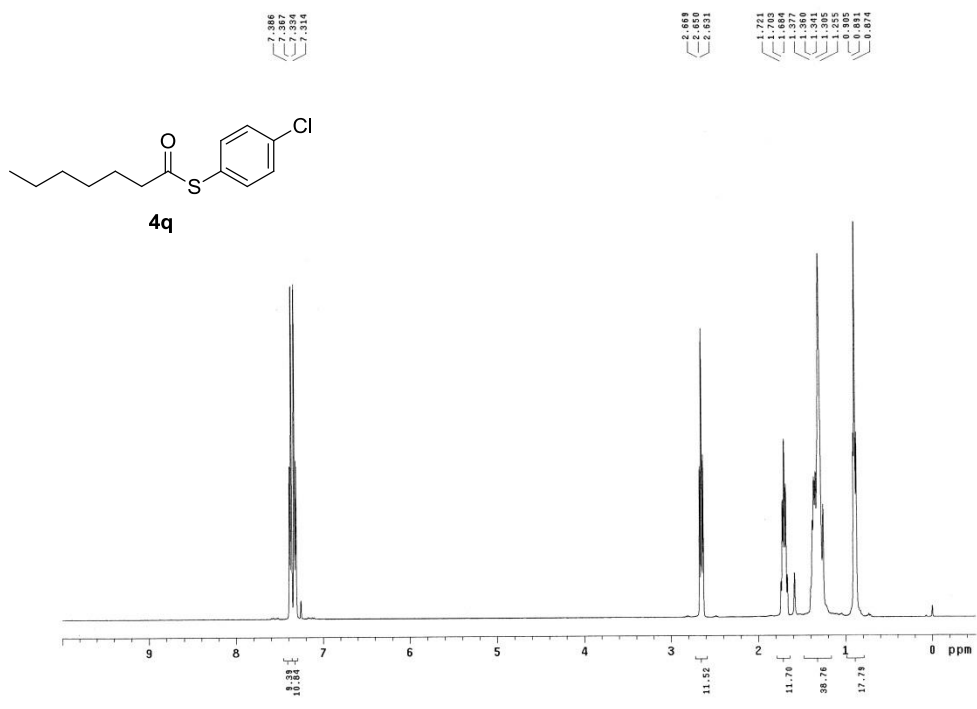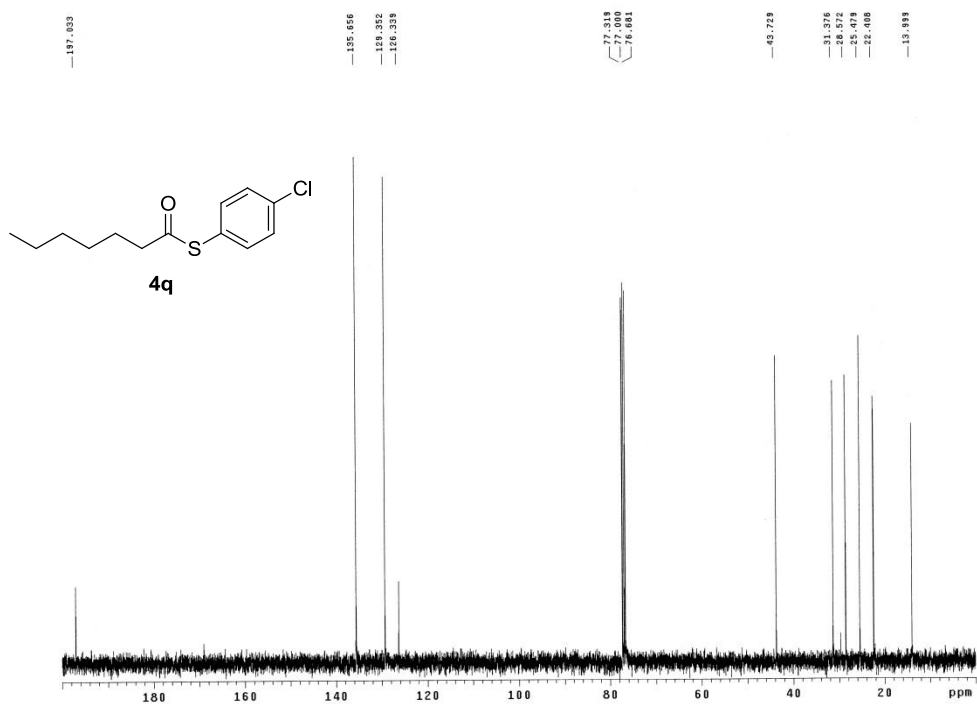

Methyl 4-((*p*-tolylthio)carbonyl)benzoate (**4r**)

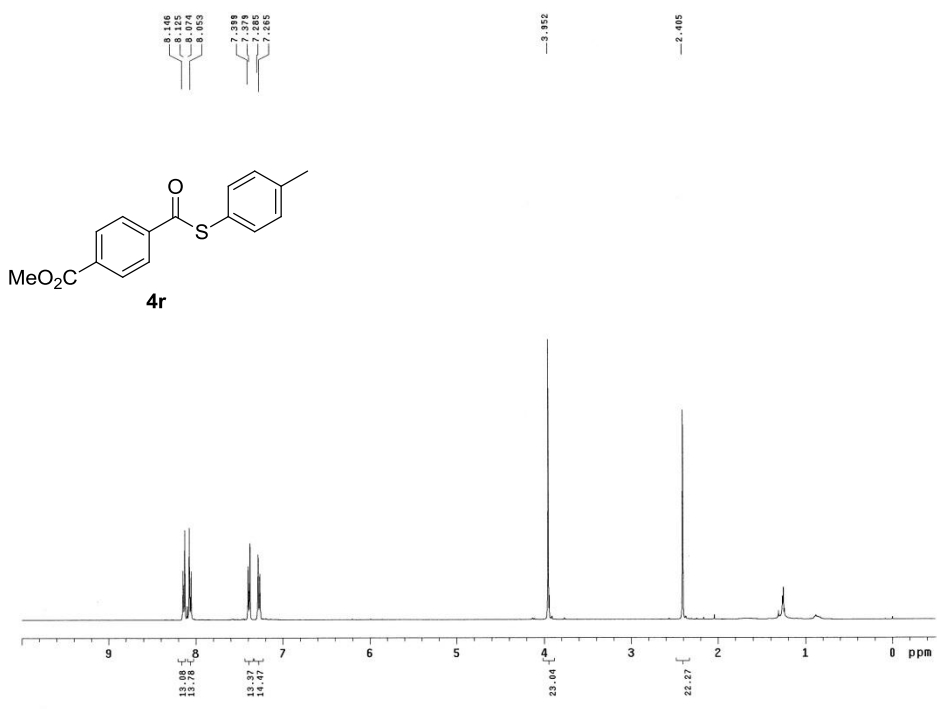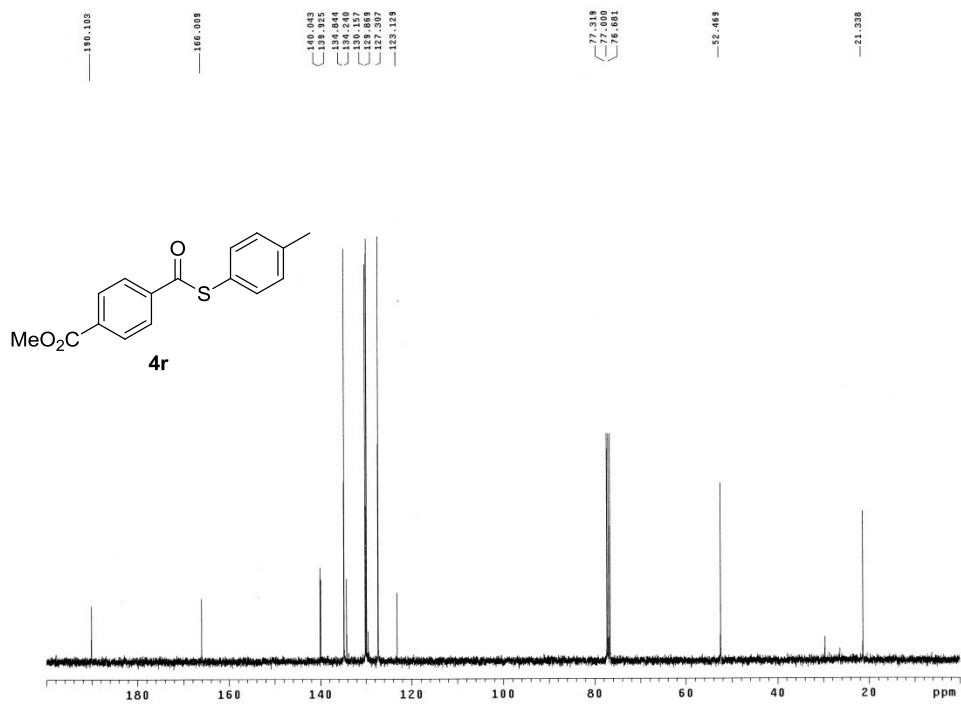

*S-p*-Tolyl thiophene-2-carbothioate (**4s**)

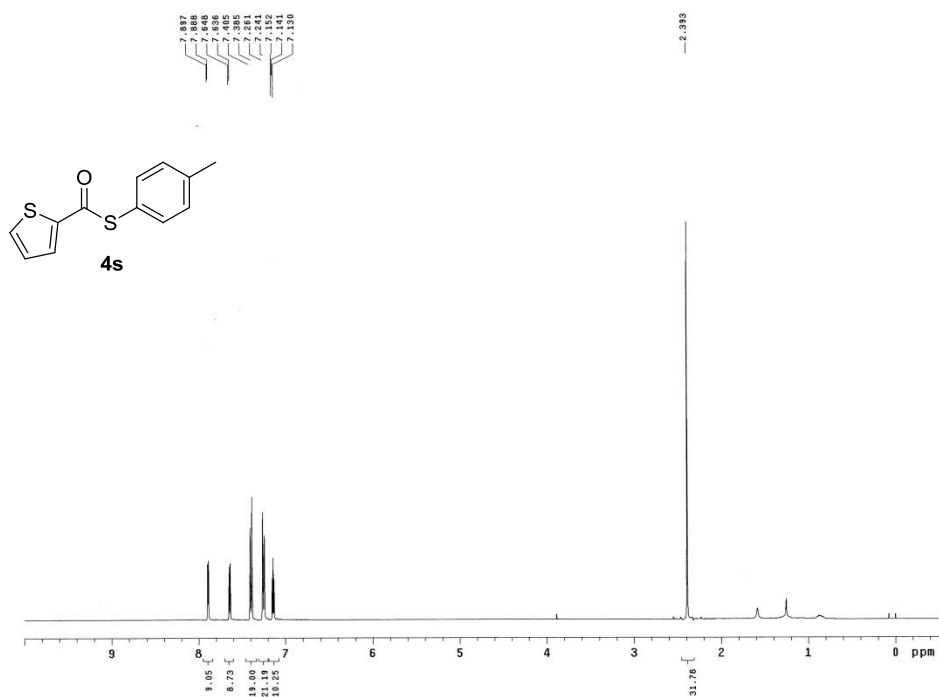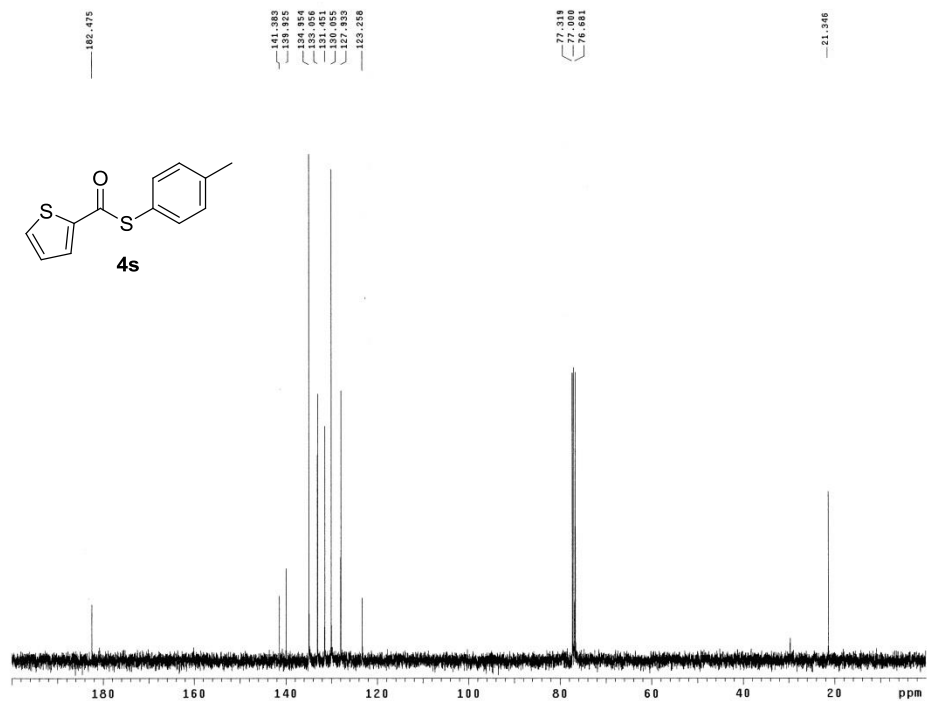

Supplement: c3gc40946e.pdf [file c3gc40946e.pdf]
